# Supplementary material for: The function of juvenile–adult transition axis in female sexual receptivity of Drosophila melanogaster
Source: eLife. 2024 Sep 6;12:RP92545. doi: 10.7554/eLife.92545 (PMC11379460; doi:10.7554/eLife.92545)
Supplement: Figure 1—figure supplement 1—source data 1. [file elife-92545-fig1-figsupp1-data1.xlsx]

## Sheet: Sheet1
Figure1- S1A				Figure1- S1B						Figure1- S1C						Figure1- S1D
Genotpe	Δadult weight	Genotpe	Δadult weight	Genotpe	CI	Genotpe	CI	Genotpe	CI	Genotpe	Speed(mm/s)	Genotpe	Speed(mm/s)	Genotpe	Speed(mm/s)	Genotpe	Speed(mm/s)	Genotpe	Speed(mm/s)	Genotpe	Speed(mm/s)
PtthDelete/PtthDelete	12.62	﹢/﹢	6.25	﹢/﹢	0.970133	PtthDelete/+	0.802467	PtthDelete/PtthDelete	0.944667	﹢/﹢	4.04	PtthDelete/+	4.48	PtthDelete/PtthDelete	4.12	﹢/﹢	3.37	PtthDelete/+	4.1	PtthDelete/PtthDelete	3.56
	16.87		-1.2		0.894967		0.905767		0.801433		3.15		4.25		5.53		3.01		5.1		7.14
	13.68		5.18		0.987433		0.899533		0.909133		4.41		5.28		4.83		4.86		5.12		3.7
	7.3		13.68		0.860833		0.792467		0.879567		4.24		2.89		3.14		4.8		3.83		3.32
	22.18		-12.88		0.806367		0.8493		0.957033		4.04		5.61		5.01		3.3		2		4.41
	8.37		5.18		0.959333		0.989967		0.936167		1.65		3.83		5.03		4.02		5.38		3.76
	12.62		-16.07		0.806633		0.9344		0.944433		2.3		5.23		3.78		3.84		4.31		5.09
	9.43		-0.13		0.942667		0.847967		0.9152		1.63		4.42		4.67		3.34		4.8
							0.7347				2.15		2.17		3.46		4.36		2.03
							0.814533				3.17		4.24		3.46				4.94
													3.93		3.42				4.9
															3.89
