# Supplementary material for: The function of juvenile–adult transition axis in female sexual receptivity of Drosophila melanogaster
Source: eLife. 2024 Sep 6;12:RP92545. doi: 10.7554/eLife.92545 (PMC11379460; doi:10.7554/eLife.92545)
Supplement: Figure 1—source data 1. [file elife-92545-fig1-data1.xlsx]

## Sheet: Sheet1
Note: the blue cells indicate that the copulation did not success within 30min.
Figure 1B	ΔPTTH=PtthDelete				Figure 1C	Figure 1D						Figure 1E						Figure 1F						Figure 1G						Figure 1I
						Genotpe	StartTime	Genotpe	StartTime	Genotpe	StartTime	Genotpe	StartTime	Genotpe	StartTime	Genotpe	StartTime	Genotpe	StartTime	Genotpe	StartTime	Genotpe	StartTime	Genotpe	StartTime	Genotpe	StartTime	Genotpe	StartTime	Genotpe	StartTime	Genotpe	StartTime	Genotpe	StartTime	Genotpe	StartTime	Genotpe	StartTime
						PtthDelete/PtthDelete	00:28:43	﹢/﹢	00:17:11	+/PtthDelete	00:19:49	PtthDelete/PtthDelete	00:03:39	﹢/﹢	00:07:08	+/PtthDelete	00:13:44	PtthDelete/PtthDelete	00:02:44	﹢/﹢	00:03:30	+/PtthDelete	00:02:08	PtthDelete/PtthDelete	00:04:30	﹢/﹢	00:15:22	+/PtthDelete	00:03:15	PtthDelete/PtthDelete	00:06:25	﹢/﹢	00:27:20	UAS-PTTH	00:23:38	Ptth-GAL4	00:23:00	Rescue	00:14:38
							00:20:14		00:05:38		00:22:10		00:01:34		00:06:06		00:03:53		00:03:00		00:06:05		00:05:09		00:02:35		00:03:07		00:07:52		00:09:23		00:29:00		00:18:47		00:14:44		00:27:48
							00:07:50		00:27:10		00:28:51		00:02:39		00:22:17		00:06:18		00:02:35		00:02:10		00:02:15		00:03:28		00:04:11		00:27:55		00:15:22		00:29:43		00:08:31		00:17:51		00:14:54
							00:01:22		00:08:35		00:21:36		00:13:47		00:27:37		00:17:55		00:06:55		00:14:27		00:08:04		00:01:59		00:01:55		00:03:22		00:28:02		00:16:47		00:13:36		00:05:40		00:21:08
							00:20:32		00:25:08		00:26:49		00:04:57		00:04:10		00:07:55		00:03:07		00:13:01		00:05:19		00:08:42		00:07:59		00:02:20		00:14:09		00:18:14		00:12:06		00:05:51		00:08:17
							00:11:23		00:17:55		00:28:13		00:05:32		00:10:05		00:02:30		00:01:13		00:04:39		00:01:36		00:02:31		00:05:04		00:03:02		00:12:50		00:14:47		00:14:03		00:24:24
							00:02:30		00:02:32		00:29:48		00:01:23		00:02:01		00:03:18		00:02:09		00:02:58		00:03:14		00:10:22		00:03:52		00:03:20		00:15:44		00:18:46		00:17:14		00:20:38
							00:03:06		00:15:32				00:02:43		00:13:27		00:06:04		00:00:53		00:09:49		00:15:36		00:01:21		00:04:53		00:08:45		00:03:14		00:07:30		00:24:18		00:20:33
							00:03:11						00:08:53		00:04:45		00:22:06		00:01:45		00:29:15		00:02:51		00:01:51		00:09:10		00:04:08		00:03:03		00:23:19		00:21:14		00:26:34
							00:24:32						00:03:22		00:02:30		00:08:20		00:02:58		00:07:42		00:15:42		00:06:24		00:09:07		00:02:29		00:01:06		00:15:25		00:19:20		00:19:37
							00:18:27						00:01:26		00:15:41		00:00:40		00:01:54		00:07:45		00:02:02		00:01:59		00:23:02		00:02:33		00:01:37		00:23:41		00:04:45		00:12:44
							00:03:54						00:06:52		00:17:11		00:01:15		00:02:27		00:01:42		00:05:05		00:04:52		00:05:48		00:03:05		00:01:28				00:02:30		00:21:54
							00:04:59						00:03:12		00:04:09		00:02:40		00:01:56		00:02:28		00:06:18		00:03:11		00:09:42		00:17:26		00:01:58				00:08:36		00:22:22
Raw data					Raw data		00:17:09						00:05:02		00:01:30		00:03:35		00:01:50		00:12:51		00:02:08		00:01:41		00:02:33		00:03:04		00:01:58				00:22:25		00:22:58
							00:19:36						00:14:04		00:06:07		00:03:06		00:05:04		00:05:59		00:04:11		00:05:07		00:01:36		00:04:39		00:03:11				00:19:53		00:04:09
							00:09:16						00:01:48		00:08:28		00:03:26		00:04:22		00:07:56		00:03:00		00:02:12		00:23:01		00:07:50		00:07:48				00:18:09		00:10:35
							00:19:48						00:13:39		00:07:00		00:09:30		00:04:08		00:03:47		00:03:22		00:01:29		00:16:36		00:06:02		00:03:08				00:25:19		00:12:35
							00:27:43						00:02:15		00:16:59		00:10:00		00:01:44		00:10:54		00:13:28		00:02:45		00:01:49		00:02:21		00:06:53				00:15:25		00:15:39
							00:15:15						00:02:25		00:23:00		00:19:20		00:01:39		00:19:57		00:09:24		00:01:52		00:02:56		00:03:24		00:20:12				00:26:25		00:20:21
							00:05:47						00:03:05		00:08:51		00:15:05		00:01:19		00:03:46		00:04:33		00:05:00		00:15:37		00:03:14		00:13:19				00:12:46		00:12:14
							00:12:22						00:01:54		00:06:06		00:15:45		00:01:35		00:05:25		00:02:39		00:01:09		00:09:16		00:11:45		00:06:39				00:10:36		00:01:55
							00:08:00						00:02:44		00:03:20		00:05:51		00:09:14		00:07:36		00:01:32		00:01:20		00:03:23		00:03:22		00:13:11				00:08:13		00:18:53
							00:19:14						00:02:14		00:02:00		00:03:09		00:01:17		00:13:31		00:01:27		00:05:23		00:12:30		00:04:51		00:05:20				00:20:35		00:18:49
							00:12:29						00:03:26		00:06:50		00:03:34		00:01:43		00:12:51		00:04:20		00:05:22		00:06:19		00:06:01		00:13:51				00:27:01		00:18:39
							00:01:02						00:18:57		00:12:42		00:05:16		00:01:18		00:10:52		00:01:41		00:01:21		00:14:14		00:20:38		00:02:13				00:13:49		00:07:09
							00:04:29						00:02:46		00:05:20		00:07:01		00:04:27		00:05:02		00:01:50		00:12:13		00:01:17		00:01:24		00:27:50				00:08:21		00:13:53
							00:03:08						00:01:45		00:16:16		00:04:20		00:02:42		00:02:52		00:04:38		00:01:39		00:04:49		00:01:51		00:02:13				00:02:45		00:10:10
Raw data							00:07:03						00:02:50		00:07:05		00:09:21		00:02:09		00:01:36		00:01:31		00:02:36		00:03:43		00:02:42		00:06:02				00:24:58		00:13:31
							00:13:38						00:04:00		00:07:10		00:09:26		00:04:11		00:05:08		00:04:02		00:01:35		00:02:44		00:09:22		00:05:37				00:11:08		00:29:04
							00:07:31						00:02:40		00:21:27		00:04:08		00:11:43		00:05:34		00:00:42		00:04:58		00:11:20		00:03:35		00:03:52				00:15:12		00:05:20
							00:04:57						00:02:45		00:02:25		00:06:53		00:03:22		00:12:14		00:00:43		00:00:50		00:04:07		00:02:05		00:12:28				00:27:30		00:23:49
							00:02:12						00:13:08		00:04:37		00:01:48		00:03:18		00:03:29		00:04:17		00:02:43		00:05:33		00:01:23		00:04:24				00:12:10		00:28:46
							00:05:06						00:09:15		00:17:08		00:02:33		00:06:11		00:02:43		00:02:12		00:01:36		00:04:58		00:02:45		00:11:11				00:01:20		00:23:12
							00:14:41						00:23:26		00:13:14		00:02:54		00:01:10		00:04:28		00:02:33		00:02:24		00:09:05		00:02:28		00:08:17				00:21:00		00:21:51
							00:23:52						00:07:55		00:02:20		00:10:55		00:05:14		00:05:52		00:05:12		00:03:13		00:11:28		00:02:48		00:12:44				00:21:14		00:09:03
							00:28:11						00:02:34		00:02:53		00:06:15		00:01:31		00:25:18		00:06:37		00:02:10		00:17:12		00:04:26		00:10:59				00:03:24		00:13:23
							00:23:13						00:03:29		00:22:41		00:04:25		00:02:07		00:20:33		00:03:49		00:04:48		00:01:55		00:04:03		00:06:09				00:16:50		00:04:03
							00:11:47						00:01:29		00:01:50		00:01:05		00:04:05		00:15:44		00:11:07		00:01:37		00:13:41		00:05:27		00:10:59				00:10:04		00:17:56
							00:24:43						00:01:37		00:13:16		00:05:14		00:01:09		00:04:19		00:12:56		00:01:37		00:16:01		00:03:50		00:19:43				00:08:54		00:15:16
							00:08:42						00:03:42		00:08:32		00:08:05		00:02:54		00:10:17		00:02:01		00:06:11		00:05:50		00:04:16		00:09:47				00:21:51		00:15:57
							00:14:06						00:02:32		00:04:21		00:03:25		00:02:51		00:04:50		00:01:41		00:01:37		00:04:11		00:05:30		00:03:17				00:10:43
							00:11:22						00:07:58		00:03:20		00:29:31		00:03:15		00:05:53		00:04:46		00:03:15		00:06:04		00:01:59		00:13:27				00:27:45
							00:29:26						00:03:18		00:07:56		00:14:00		00:03:01		00:05:20		00:10:47		00:07:16		00:02:23		00:04:28		00:02:23				00:10:56
							00:07:21						00:02:38		00:07:45		00:03:20		00:02:42		00:03:55		00:19:05		00:05:03		00:02:40		00:01:58		00:08:58				00:10:20
							00:29:56						00:01:31		00:07:45		00:07:45		00:06:12		00:02:02		00:04:27		00:01:48		00:04:14		00:08:38		00:12:43				00:26:42
							00:11:41						00:00:46		00:19:36		00:29:27		00:08:26		00:03:04		00:02:35		00:03:07		00:07:42		00:02:23		00:11:33				00:19:53
							00:28:44						00:02:22		00:06:17		00:05:11		00:08:20		00:05:09		00:07:57		00:06:29		00:05:44		00:02:36		00:04:53				00:12:54
													00:02:07		00:09:37		00:02:05		00:02:07		00:03:25		00:04:05		00:04:30		00:05:35		00:12:00		00:01:40				00:11:32
													00:01:42		00:14:45		00:02:10		00:03:20		00:03:25		00:05:07		00:08:02		00:05:42		00:04:15		00:15:07				00:25:35
													00:07:17		00:03:00		00:01:30		00:01:51		00:04:37		00:07:31		00:02:47		00:03:53		00:04:16		00:24:15				00:26:03
													00:02:05		00:02:39		00:12:55		00:04:56		00:07:28		00:05:06		00:01:17		00:07:30		00:06:09		00:05:41				00:17:27
													00:02:00		00:02:13		00:09:00		00:08:58		00:09:38		00:05:46		00:05:35		00:07:36		00:04:37		00:09:26				00:21:58
													00:01:48		00:06:16		00:14:45		00:01:40		00:23:08		00:02:19		00:02:32		00:02:10		00:03:10		00:08:26				00:19:39
													00:02:05		00:05:00		00:05:16		00:04:03		00:12:57		00:11:24		00:09:54		00:05:15		00:02:09		00:07:14				00:20:55
													00:23:16		00:10:35		00:12:51		00:01:00		00:17:03		00:03:23		00:02:41		00:05:38		00:03:44		00:25:15				00:17:34
													00:04:50		00:08:20		00:20:42		00:01:13		00:05:26		00:01:19		00:05:59		00:07:16		00:03:59		00:02:42				00:28:28
													00:02:57		00:19:34		00:06:06		00:01:20		00:26:43		00:00:45		00:02:24		00:03:10		00:06:42		00:14:52				00:22:21
													00:20:45		00:11:57		00:06:06		00:02:19		00:24:44		00:01:10		00:02:45		00:06:12		00:02:20		00:20:33				00:04:57
													00:09:07		00:07:31		00:09:18		00:04:12		00:03:30		00:02:15		00:02:26		00:10:32		00:01:16		00:03:39				00:13:49
													00:11:12		00:15:07		00:05:43		00:01:14		00:05:12		00:04:29		00:01:53		00:26:35		00:02:25		00:04:48				00:08:31
													00:04:26		00:03:26		00:04:53		00:02:42		00:03:43		00:09:15		00:02:03		00:21:55		00:02:20		00:14:14				00:29:54
													00:04:05		00:06:25		00:28:50		00:02:52		00:16:24		00:05:10		00:10:56		00:00:54		00:05:30		00:17:18				00:28:08
													00:07:05		00:02:50		00:03:23		00:00:47		00:01:19		00:04:56		00:01:31		00:03:59		00:06:29		00:04:58				00:10:39
													00:04:45		00:03:25		00:08:19		00:14:33		00:05:06		00:11:40		00:02:38		00:02:42		00:00:41		00:18:24				00:16:12
													00:03:12		00:04:02		00:04:24		00:02:41		00:18:52		00:01:12		00:06:10		00:04:48		00:03:25		00:01:51				00:02:07
													00:05:38		00:02:45		00:06:40		00:00:58		00:19:50		00:01:41		00:03:24		00:04:00		00:03:47		00:04:09				00:26:01
													00:02:40		00:02:10		00:01:40		00:06:46		00:03:09		00:10:08		00:01:58		00:04:11		00:06:10		00:07:25				00:23:52
													00:07:45		00:19:11		00:22:16		00:08:09		00:11:02		00:08:30		00:01:07		00:04:08		00:02:51		00:08:56				00:17:51
													00:18:21		00:10:10		00:23:46		00:03:10		00:03:46		00:05:30		00:08:48		00:07:00		00:03:30		00:04:16				00:11:38
													00:12:35		00:02:59		00:22:31		00:03:31		00:15:46		00:02:51		00:00:32		00:05:38		00:01:56		00:20:08
													00:10:45		00:05:09		00:04:50		00:02:59		00:06:02		00:02:29		00:04:16		00:05:03		00:02:40		00:10:56
													00:02:47		00:07:25		00:01:40		00:01:26		00:09:11		00:02:17		00:01:36		00:07:54		00:00:58		00:27:14
													00:03:07		00:05:05		00:04:25		00:00:52		00:20:02		00:04:24		00:02:24		00:04:08		00:03:05		00:08:13
													00:06:42		00:28:14		00:15:06		00:07:05		00:07:21		00:04:33		00:12:55		00:08:33		00:02:25		00:13:08
													00:02:33		00:17:53		00:03:56		00:02:38		00:04:43		00:01:42		00:00:57		00:18:05		00:05:37		00:09:18
													00:00:53		00:13:04		00:18:52		00:01:57		00:04:50		00:02:01		00:09:58		00:09:04		00:01:37		00:04:26
													00:13:03		00:02:30		00:03:41		00:04:24		00:18:37		00:05:50		00:00:33		00:03:13		00:02:06		00:05:38
													00:08:08				00:04:20		00:01:47		00:13:05		00:02:14		00:03:21		00:02:41		00:01:11		00:08:07
													00:03:32				00:02:45		00:13:34		00:08:08		00:06:56		00:04:07		00:07:18		00:09:46		00:10:12
													00:02:57				00:09:30		00:03:32		00:18:54		00:06:45		00:09:20		00:04:01		00:01:26		00:04:52
													00:03:02				00:06:34		00:04:12		00:02:31		00:03:37		00:01:08		00:01:13		00:05:20		00:25:36
													00:02:12				00:10:40		00:03:52		00:08:49		00:08:47		00:04:14		00:10:30		00:05:58		00:04:03
													00:03:22				00:04:44		00:03:37		00:07:56		00:04:29		00:06:07		00:01:38		00:02:17		00:10:19
													00:07:14				00:27:09		00:01:06		00:03:05		00:24:29		00:11:03		00:05:50		00:01:32		00:28:46
													00:02:43				00:04:24		00:01:15		00:02:59		00:12:02		00:03:03		00:03:01		00:01:55		00:05:20
													00:02:03				00:07:45		00:02:10		00:11:44		00:00:47		00:03:10		00:11:30		00:04:52		00:19:00
													00:02:35				00:10:11		00:02:14		00:10:59		00:04:52		00:01:01		00:05:29		00:02:32		00:04:03
													00:01:20				00:04:41		00:01:19		00:24:05		00:08:55		00:02:04		00:23:55		00:03:15		00:13:12
													00:23:56				00:01:51		00:03:30		00:21:57		00:03:57		00:06:36		00:04:08		00:01:59		00:28:27
													00:04:37				00:12:31		00:01:13		00:07:07		00:02:19		00:02:35		00:06:50		00:00:51		00:18:20
													00:01:24				00:18:28		00:07:05		00:03:15		00:02:12		00:01:29		00:03:33		00:02:24		00:20:43
													00:05:27				00:08:16		00:01:40		00:06:06		00:02:14		00:02:45		00:16:18		00:01:12		00:26:21
													00:02:26				00:03:13		00:01:47		00:07:15		00:24:23		00:08:39				00:04:05		00:11:30
													00:02:56				00:01:33		00:01:46		00:07:01		00:01:26		00:03:48				00:01:55		00:11:45
													00:18:32				00:04:23		00:05:49		00:03:11		00:02:33		00:00:50				00:03:58		00:03:38
													00:03:30				00:02:54		00:06:21		00:07:58		00:02:18		00:05:24				00:07:26		00:12:13
													00:16:01				00:03:09		00:01:32		00:09:43		00:02:13		00:03:14				00:03:59		00:14:53
													00:10:53				00:07:15		00:06:16		00:08:29		00:06:23		00:02:21				00:01:52		00:01:51
													00:03:33				00:08:30		00:01:19		00:00:48		00:07:06		00:03:30				00:02:25		00:13:57
													00:11:35				00:18:41		00:00:28		00:00:51		00:00:44		00:00:44				00:07:20		00:05:32
													00:03:05				00:03:59		00:05:12		00:03:26		00:02:50		00:04:04				00:01:02		00:13:52
													00:03:05				00:04:29		00:03:59		00:09:39		00:00:36		00:00:49				00:05:25		00:02:01
													00:10:30				00:08:30		00:14:31		00:03:13		00:01:46		00:03:20				00:00:55
													00:02:54				00:05:45		00:01:25				00:01:36		00:00:40				00:04:39
													00:12:27				00:04:25		00:04:06				00:04:42		00:01:02				00:01:02
													00:03:08				00:22:12		00:02:04				00:19:44		00:01:12				00:15:26
													00:01:18				00:05:51		00:02:26				00:05:49		00:01:46				00:09:22
													00:03:23				00:28:18		00:02:32				00:05:47		00:01:32				00:04:53
													00:02:11				00:06:35		00:02:30				00:04:49		00:02:41				00:04:10
													00:02:05				00:03:00		00:07:43				00:02:38		00:02:04				00:01:14
													00:01:00				00:06:15		00:01:47				00:18:12		00:05:06				00:04:11
													00:22:46				00:01:59		00:02:28				00:03:20		00:27:18				00:09:14
													00:01:00				00:12:50		00:06:16				00:03:25						00:00:58
													00:04:52				00:02:39		00:04:21				00:04:07						00:08:13
													00:22:25				00:04:59		00:04:52				00:01:58
													00:01:29				00:05:34		00:08:27				00:04:10
													00:10:47				00:02:49		00:00:33				00:04:42
													00:14:12				00:09:23		00:00:45				00:22:22
													00:01:46				00:27:22		00:01:59				00:07:08
													00:07:05						00:04:14				00:04:45
													00:08:15						00:04:27				00:04:45
													00:04:25						00:04:36				00:05:22
													00:01:45						00:04:17				00:05:04
													00:07:03						00:00:58				00:02:43
													00:03:18										00:02:15
													00:22:01										00:03:02
																							00:06:18
																							00:06:59
																							00:07:50
																							00:04:09
																							00:03:28
																							00:01:40
																							00:04:01
																							00:07:57
																							00:03:08
																							00:01:54
																							00:13:47
																							00:01:48
																							00:03:20
