# Supplementary material for: The function of juvenile–adult transition axis in female sexual receptivity of Drosophila melanogaster
Source: eLife. 2024 Sep 6;12:RP92545. doi: 10.7554/eLife.92545 (PMC11379460; doi:10.7554/eLife.92545)
Supplement: Figure 2—figure supplement 1—source data 1. [file elife-92545-fig2-figsupp1-data1.xlsx]

## Sheet: Sheet1
Note: the blue cells indicate that the copulation did not success within 30min.
Figure2-S1-C						Figure2-S1-D-larval stage						Figure2-S1-D-pupal stage						Figure2-S1-D-adult stage
Genotpe	StartTime	Genotpe	StartTime	Genotpe	StartTime	Genotpe	StartTime	Genotpe	StartTime	Genotpe	StartTime	Genotpe	StartTime	Genotpe	StartTime	Genotpe	StartTime	Genotpe	StartTime	Genotpe	StartTime	Genotpe	StartTime
UAS-DsxF-RNAi/+	00:18:43	Ptth-Gal4/+;UAS-DsxF-RNAi/+	00:06:49	Ptth-Gal4/+	00:04:19	PtthGAL4/tub-GAL80ts;kir2.1/+	00:09:01	PtthGAL4/+;+/+	00:05:01	tub-GAL80ts/+;kir2.1/+	00:03:52	PtthGAL4/tub-GAL80ts;kir2.1/+	00:14:49	PtthGAL4/+;+/+	00:24:25	tub-GAL80ts/+;kir2.1/+	00:10:00	PtthGAL4/tub-GAL80ts;kir2.1/+	00:06:39	PtthGAL4/+;+/+	00:16:36	tub-GAL80ts/+;kir2.1/+	00:05:27
	00:03:37		00:05:31		00:02:41		00:06:50		00:03:33		00:10:54		00:03:34		00:03:53		00:04:12		00:01:45		00:09:28		00:05:15
	00:11:26		00:07:20		00:05:06		00:06:00		00:16:58		00:05:15		00:05:41		00:03:12		00:05:53		00:03:42		00:02:48		00:03:51
	00:27:31		00:02:37		00:09:27		00:07:15		00:04:58		00:03:57		00:06:09		00:02:45		00:05:06		00:04:46		00:23:06		00:06:22
	00:06:38		00:06:43		00:16:58		00:05:24		00:11:57		00:04:08		00:01:57		00:06:01		00:07:48		00:05:48		00:09:27		00:05:49
	00:04:25		00:09:50		00:04:42		00:12:20		00:02:55		00:05:00		00:10:38		00:12:02		00:09:59		00:01:37		00:12:15		00:06:33
	00:05:17		00:04:36		00:11:17		00:05:12		00:02:45		00:03:47		00:04:37		00:18:00		00:06:03		00:04:37		00:05:16		00:15:58
	00:01:54		00:12:49		00:03:08		00:12:40		00:09:14		00:07:11		00:03:14		00:05:54		00:07:41		00:05:17		00:02:47		00:10:02
	00:07:00		00:04:03		00:06:19		00:06:03		00:16:33		00:06:19		00:03:09		00:11:43		00:09:49		00:01:48		00:01:55		00:08:18
	00:03:31		00:05:40		00:02:15		00:01:13		00:04:45		00:08:39		00:25:39		00:17:28		00:06:03		00:01:41		00:12:07		00:14:53
	00:12:40		00:24:46		00:10:08		00:02:47		00:05:14		00:05:58		00:15:38		00:02:36		00:06:43		00:04:59		00:05:55		00:19:24
	00:03:45		00:07:36		00:08:21		00:04:31		00:11:28		00:02:02		00:04:31		00:03:04		00:16:24		00:02:40		00:06:54		00:01:28
	00:04:27		00:14:27		00:05:19		00:10:11		00:09:37		00:03:35		00:02:05		00:09:35		00:18:27		00:03:00		00:00:48		00:06:06
	00:06:46		00:05:38		00:02:53		00:04:16		00:02:38		00:04:43		00:02:09		00:08:32		00:06:16		00:02:48		00:05:14		00:06:30
	00:05:57		00:05:57		00:13:32		00:07:18		00:18:07		00:05:24		00:03:09		00:08:00		00:12:58		00:01:21		00:02:28		00:20:23
	00:22:47		00:04:21		00:01:52		00:05:17		00:05:16		00:05:19		00:13:39		00:02:56		00:02:21		00:07:05		00:02:38		00:01:22
	00:09:56		00:05:07		00:02:20		00:12:52		00:03:45		00:03:44		00:04:39		00:11:03		00:03:36		00:02:36		00:09:26		00:04:18
	00:01:54		00:05:35		00:05:06		00:10:10		00:23:25		00:06:59		00:03:49		00:04:48		00:06:43		00:02:07		00:27:02		00:11:55
	00:06:47		00:04:50		00:06:51		00:08:22		00:05:16		00:02:33		00:12:18		00:05:00		00:06:16		00:04:04		00:01:20		00:01:22
	00:20:08		00:09:24		00:06:44		00:08:54		00:03:49		00:05:08		00:03:59		00:03:03		00:05:31		00:13:27		00:13:22		00:12:18
	00:02:17		00:02:08		00:05:57		00:04:07		00:04:09		00:11:17		00:04:28		00:09:25		00:07:03		00:21:07		00:03:04		00:04:41
	00:10:38		00:05:12		00:20:58		00:05:57		00:05:15		00:04:33		00:03:29		00:04:34		00:05:17		00:02:02		00:04:00		00:04:41
	00:14:49		00:03:17		00:07:48		00:04:24		00:09:45		00:04:08		00:07:33		00:19:22		00:07:19		00:02:02		00:03:31		00:07:54
	00:19:58		00:05:03		00:04:57		00:08:18		00:09:01		00:10:23		00:28:45		00:14:03		00:01:52		00:04:08		00:03:50		00:18:23
	00:04:05		00:17:25		00:05:23		00:06:25		00:06:14		00:03:47		00:04:58		00:03:36		00:01:58		00:01:58		00:05:45		00:08:09
	00:10:49		00:15:46		00:04:58		00:07:17		00:03:01		00:04:55		00:04:23		00:10:49		00:03:56		00:02:57		00:03:56		00:02:16
	00:08:10		00:06:51		00:02:33		00:13:06		00:02:28		00:08:04		00:07:44		00:13:36		00:14:44		00:05:15		00:02:47		00:04:23
	00:21:23		00:05:51		00:07:49		00:05:33		00:09:56		00:06:18		00:03:06		00:10:51		00:10:29		00:02:32		00:19:09		00:01:45
	00:18:41		00:11:10		00:04:45		00:04:09		00:11:26		00:10:06		00:02:49		00:13:37		00:03:57		00:01:29		00:02:16		00:02:43
	00:18:37		00:02:15		00:02:46		00:06:40		00:01:30		00:09:02		00:11:38		00:02:40		00:12:15		00:02:07		00:03:13		00:02:13
	00:23:42		00:02:59		00:02:14		00:08:12		00:05:31		00:08:40		00:03:22		00:02:27		00:13:52		00:02:18		00:05:48		00:09:56
	00:03:00		00:03:57		00:14:38		00:05:53		00:04:57		00:17:11		00:11:26		00:03:46		00:03:51		00:01:01		00:08:42		00:14:53
	00:03:36		00:04:46		00:04:36		00:14:16		00:04:31		00:08:41		00:02:49		00:04:29		00:12:57		00:04:06		00:04:27		00:05:18
	00:12:17		00:05:40		00:04:34		00:16:38		00:03:57		00:05:07		00:04:27		00:24:17		00:13:56		00:05:56		00:06:50		00:04:14
	00:04:19		00:05:45		00:17:38		00:07:38		00:04:23		00:09:38		00:16:17		00:02:40		00:09:28		00:06:11		00:23:18		00:01:53
	00:04:28		00:11:34		00:13:16		00:10:09		00:04:14		00:17:02		00:08:52		00:29:03		00:06:12		00:01:57		00:03:40		00:02:38
	00:10:40		00:04:20		00:08:34		00:04:51		00:07:38		00:08:50		00:05:01		00:03:58		00:10:16		00:02:48		00:03:48		00:07:10
	00:24:12		00:02:04		00:03:46		00:09:20		00:06:53		00:07:24		00:05:31		00:03:21		00:04:51		00:00:47		00:04:53		00:09:35
	00:07:52		00:07:07		00:04:46		00:09:15		00:03:46		00:08:50		00:04:25		00:04:39		00:05:12		00:04:45		00:30:00		00:11:21
	00:11:11		00:06:05		00:07:49		00:08:11		00:12:14		00:05:14		00:16:11		00:03:10		00:08:20		00:01:25		00:04:38		00:10:52
	00:09:29		00:02:33		00:04:59		00:26:39		00:08:40		00:03:11		00:05:31		00:04:48		00:01:40		00:01:23		00:16:34		00:01:59
	00:05:45		00:04:32		00:03:50		00:09:05		00:04:14		00:05:20		00:05:39		00:04:47		00:01:32		00:10:45		00:07:26		00:10:40
	00:10:49		00:30:00		00:09:12		00:06:12		00:05:10		00:06:03		00:02:01		00:06:23		00:10:01		00:03:13		00:01:36		00:02:57
	00:12:46		00:04:35		00:08:10		00:04:26		00:03:34		00:04:07		00:14:51		00:02:44		00:08:40		00:01:33		00:01:00		00:13:43
	00:27:38		00:05:12		00:03:58		00:24:23		00:27:42		00:13:19		00:02:32		00:04:23		00:05:46		00:05:18		00:01:07		00:03:00
	00:12:30		00:06:51		00:03:39		00:04:01		00:05:47		00:09:16		00:05:24		00:02:54		00:09:11		00:03:38		00:03:28		00:02:24
	00:03:05		00:08:59		00:04:13		00:03:51		00:04:40		00:12:38		00:20:26		00:12:55		00:16:13		00:08:03		00:09:47		00:04:40
	00:02:30		00:02:33		00:05:30		00:09:55		00:03:02		00:05:37		00:04:15		00:07:42		00:02:23		00:05:48		00:02:18		00:03:05
	00:16:58		00:03:00		00:05:43		00:09:31		00:09:17		00:07:47		00:04:20		00:16:38		00:03:55		00:03:14		00:15:48		00:07:21
	00:03:00		00:04:55				00:10:14		00:05:16		00:05:36		00:03:56		00:16:35		00:01:49		00:02:22		00:18:03		00:09:36
	00:03:00		00:04:37				00:18:40		00:10:11		00:03:42		00:08:41		00:02:38		00:16:29		00:05:02		00:10:43		00:30:00
	00:09:22		00:04:36				00:08:17		00:04:47		00:05:43		00:04:27		00:03:37		00:05:00		00:03:40		00:03:34		00:06:58
	00:14:08		00:05:24				00:05:14		00:05:15		00:08:08		00:05:43		00:05:24		00:06:12		00:12:45		00:05:51		00:04:20
	00:03:29		00:04:02				00:17:34		00:03:34		00:28:35		00:07:53		00:15:11		00:06:15		00:01:34		00:06:13		00:04:39
	00:06:59		00:02:26				00:05:32		00:04:49		00:08:32		00:03:55		00:05:29		00:11:27		00:02:36		00:04:38		00:06:23
	00:05:00		00:23:17				00:05:00		00:02:52		00:08:28		00:12:29		00:12:28		00:05:11		00:12:20		00:01:13		00:03:10
	00:14:28		00:04:33				00:11:47		00:06:36		00:04:51		00:07:45		00:13:07		00:03:07		00:02:14		00:00:46		00:06:38
	00:24:34		00:17:52				00:04:16		00:05:10		00:16:02		00:05:40		00:08:51		00:04:15		00:01:50		00:03:37		00:02:33
	00:02:59		00:04:10				00:06:43		00:08:12		00:05:20		00:06:57		00:04:31		00:03:53		00:05:37		00:09:00		00:01:26
	00:06:38		00:06:02				00:13:21		00:12:15		00:03:32		00:17:24		00:04:24		00:04:43		00:02:26		00:04:22		00:03:43
	00:03:58		00:04:30				00:04:12		00:04:09		00:24:23		00:06:13		00:16:49		00:05:57		00:03:01		00:04:39		00:03:18
	00:04:02		00:06:26				00:02:00		00:22:49		00:10:53		00:11:49		00:06:29		00:12:38		00:04:04		00:15:51		00:05:55
	00:07:31		00:11:57				00:04:29				00:02:07		00:09:15		00:05:14		00:05:28		00:05:46		00:11:17		00:07:19
	00:21:11		00:05:46				00:07:35				00:04:51		00:07:22		00:10:19		00:03:44		00:02:47		00:03:20		00:01:26
	00:10:32		00:04:56				00:07:16				00:11:42		00:03:12		00:19:53		00:06:35		00:02:54		00:12:51		00:04:28
	00:05:41		00:03:12				00:02:39				00:06:35		00:02:19		00:03:51		00:05:18		00:02:04		00:15:29		00:04:36
	00:07:29		00:10:12				00:04:39				00:05:31		00:10:21		00:01:55		00:03:32		00:10:14		00:30:00		00:03:48
	00:09:44		00:04:33				00:08:08				00:11:38		00:14:36		00:06:54		00:03:36		00:02:48		00:02:09		00:07:18
			00:23:07				00:06:25						00:22:06		00:07:12		00:01:45		00:06:33		00:10:25		00:07:06
			00:01:35				00:08:05						00:04:01		00:03:40		00:05:15		00:02:05		00:05:20		00:24:53
			00:05:45				00:05:58						00:05:51		00:04:18		00:06:41		00:03:44		00:01:46		00:01:22
							00:09:16						00:04:33		00:05:13		00:12:06		00:06:28		00:04:13		00:03:34
							00:09:19						00:05:13		00:07:24		00:12:06		00:10:06		00:06:01		00:05:48
							00:06:59						00:03:12		00:09:13		00:07:38		00:03:36		00:08:25		00:03:08
							00:13:27						00:04:56		00:02:49		00:06:10		00:06:56		00:01:29		00:02:10
							00:13:24						00:07:57		00:18:51		00:05:13		00:07:36		00:04:52		00:03:20
							00:07:03						00:02:58		00:18:21		00:26:42		00:03:44		00:06:46		00:02:54
							00:03:09						00:06:43		00:05:48		00:14:53		00:03:44		00:03:19		00:02:01
							00:17:28						00:03:06		00:02:17		00:03:33		00:05:50		00:14:51		00:05:05
							00:06:21						00:12:11		00:08:22		00:14:12		00:06:45		00:08:24		00:03:09
							00:03:29						00:07:18		00:04:06		00:18:27		00:03:45		00:03:07		00:08:05
							00:05:11						00:04:05		00:04:54		00:07:22		00:02:19		00:25:18		00:04:32
							00:07:12						00:08:58				00:02:55		00:02:39		00:01:54		00:09:56
							00:05:33						00:06:27						00:02:57		00:15:11		00:07:46
							00:05:50												00:10:37				00:06:46
							00:06:24												00:03:11				00:08:49
																			00:03:54				00:05:28
																			00:11:00				00:02:44
																			00:16:45				00:01:17
																			00:15:39				00:07:42
																			00:01:47				00:03:04
																			00:02:39				00:03:49
																			00:04:50				00:04:19
																							00:13:17
																							00:02:15
																							00:05:24
																							00:02:43
																							00:02:33
																							00:03:07
																							00:01:22
																							00:03:14
																							00:12:40
																							00:04:13
																							00:03:01
																							00:05:55
																							00:04:51
																							00:02:29
