# Supplementary material for: The function of juvenile–adult transition axis in female sexual receptivity of Drosophila melanogaster
Source: eLife. 2024 Sep 6;12:RP92545. doi: 10.7554/eLife.92545 (PMC11379460; doi:10.7554/eLife.92545)
Supplement: Figure 3—source data 1. [file elife-92545-fig3-data1.xlsx]

## Sheet: Sheet1
Note: the blue cells indicate that the copulation did not success within 30min.
Figure 3B	23	29		23	29		23	29	Figure 3C	23	29		23	29		23	29	Figure 3D	23	29		23	29		23	29	Figure 3E	23	29		23	29		23	29	Figure 3G	23	29		23	29		23	29
Genotpe	StartTime	StartTime	Genotpe	StartTime	StartTime	Genotpe	StartTime	StartTime	Genotpe	StartTime	StartTime	Genotpe	StartTime	StartTime	Genotpe	StartTime	StartTime	Genotpe	StartTime	StartTime	Genotpe	StartTime	StartTime	Genotpe	StartTime	StartTime	Genotpe	StartTime	StartTime	Genotpe	StartTime	StartTime	Genotpe	StartTime	StartTime	Genotpe	speed(mm/s)	speed(mm/s)	Genotpe	speed(mm/s)	speed(mm/s)	Genotpe	speed(mm/s)	speed(mm/s)
PtthGAL4	00:03:20	00:10:04	UAS-dTrpA1	00:12:10	00:08:38	PtthGAL4>UAS-PTTH	00:06:25	00:08:05	PtthGAL4	00:02:36	00:02:23	UAS-dTrpA1	00:08:35	00:05:29	PtthGAL4>UAS-PTTH	00:08:26	00:02:36	PtthGAL4	00:01:36	00:06:29	UAS-dTrpA1	00:02:11	00:04:12	PtthGAL4>UAS-PTTH	00:08:17	00:10:52	PtthGAL4	00:05:19	00:03:58	UAS-dTrpA1	00:13:17	00:05:32	PtthGAL4>UAS-PTTH	00:26:19	00:10:22	PtthGAL4	2.67808	2.59885	UAS-dTrpA1	2.58491	2.59066	PtthGAL4>UAS-PTTH	2.5608	2.50101
	00:09:09	00:02:27		00:05:52	00:04:47		00:03:41	00:05:52		00:06:06	00:09:43		00:10:08	00:15:56		00:10:41	00:07:40		00:05:06	00:04:08		00:04:40	00:06:57		00:05:07	00:11:08		00:02:08	00:04:21		00:06:22	00:06:36		00:13:00	00:13:16		2.46956	2.71809		0.993159	2.29826		3.23423	2.65162
	00:08:01	00:04:22		00:08:44	00:09:23		00:07:15	00:02:24		00:17:43	00:06:34		00:10:45	00:06:59		00:14:26	00:12:49		00:04:20	00:07:16		00:02:07	00:06:47		00:03:33	00:14:26		00:03:12	00:03:24		00:08:15	00:19:47		00:08:07	00:28:40		2.34509	2.36632		1.87922	2.95083		2.72699	2.79219
	00:15:18	00:02:41		00:01:32	00:02:05		00:03:20	00:14:47		00:04:18	00:04:46		00:04:04	00:11:08		00:05:25	00:05:59		00:03:37	00:02:22		00:01:22	00:12:41		00:10:51	00:10:00		00:02:20	00:03:12		00:11:53	00:04:28		00:09:27	00:07:51		2.13731	1.98379		3.08219	2.6698		3.39812	2.98258
	00:05:43	00:03:37		00:04:37	00:10:12		00:04:45	00:01:19		00:06:20	00:16:39		00:03:24	00:07:32		00:02:50	00:07:24		00:00:59	00:02:25		00:01:30	00:06:08		00:09:42	00:14:26		00:03:00	00:03:41		00:04:31	00:03:02		00:08:29	00:06:49		2.77296	1.62837		1.14127	2.00255		3.48372	2.99672
	00:03:31	00:17:36		00:01:52	00:05:42		00:05:42	00:06:15		00:02:31	00:02:03		00:00:53	00:12:28		00:02:52	00:09:03		00:02:06	00:03:31		00:09:36	00:08:25		00:07:58	00:09:33		00:01:23	00:02:57		00:06:46	00:11:50		00:17:23	00:04:28		2.44387	2.56321		1.40385	2.4202		2.94253	2.75263
	00:04:20	00:02:20		00:13:39	00:17:05		00:30:07	00:10:26		00:04:29	00:20:34		00:06:07	00:21:49		00:03:36	00:12:43		00:03:59	00:07:14		00:00:39	00:08:55		00:10:28	00:07:10		00:02:55	00:09:57		00:03:17	00:22:36		00:13:11	00:06:39		2.5512	2.08235		2.6853	2.09586		2.75148	2.67753
	00:05:20	00:05:24		00:05:38	00:05:15		00:12:03	00:15:50		00:02:12	00:06:09		00:14:49	00:05:51		00:05:39	00:13:21		00:04:40	00:08:39		00:13:17	00:12:40		00:04:12	00:12:16		00:03:49	00:04:58		00:06:37	00:28:43		00:02:47	00:10:03		2.55198	2.48923		2.65645	2.40367		2.25067	2.4806
	00:02:23	00:04:12		00:16:48	00:06:58		00:12:03	00:13:10		00:09:30	00:08:37		00:06:51	00:02:59		00:05:56	00:11:51		00:00:42	00:06:01		00:06:22	00:09:29		00:28:19	00:08:07		00:01:17	00:02:38		00:05:07	00:02:58		00:00:56	00:06:58			2.08247		1.06054	2.52952			2.76755
	00:03:23	00:04:36		00:01:55	00:26:00		00:16:17	00:09:43		00:00:40	00:01:24		00:06:31	00:18:44		00:09:09	00:08:21		00:02:37	00:06:53		00:08:15	00:10:51		00:00:49	00:06:03		00:03:23	00:03:48		00:03:30	00:05:52		00:06:38	00:07:21			2.17356		3.63687	3.42094
	00:13:25	00:05:11		00:10:43	00:06:39		00:08:51	00:06:59		00:02:02	00:02:34		00:13:35	00:12:31		00:10:43	00:09:22		00:03:17	00:03:21		00:11:53	00:05:21		00:08:08	00:09:46		00:06:36	00:09:27		00:05:26	00:05:43		00:14:12	00:06:07					2.5344	3.21684
	00:06:44	00:05:30		00:10:47	00:06:26		00:06:15	00:17:42		00:00:35	00:11:21		00:06:33	00:04:27		00:10:49	00:06:15		00:02:58	00:11:20		00:04:31	00:05:32		00:26:19	00:12:05		00:21:30	00:08:07		00:08:41	00:05:30		00:14:12	00:01:19						2.4154
	00:02:33	00:07:42		00:06:51	00:05:07		00:01:22	00:18:56		00:02:20	00:07:33		00:08:18	00:06:34		00:19:16	00:17:45		00:02:19	00:03:58		00:06:46	00:06:36		00:13:00	00:10:22		00:04:24	00:10:44		00:05:24	00:02:30		00:10:35	00:11:58
	00:07:42	00:06:55		00:12:01	00:01:52		00:04:19	00:07:06		00:05:49	00:03:52		00:04:16	00:05:49		00:03:19	00:18:35		00:01:16	00:04:21		00:03:17	00:19:47		00:08:07	00:13:16		00:07:59	00:05:52		00:04:04	00:11:38		00:02:06	00:13:17
	00:06:38	00:02:28		00:03:27	00:04:05		00:02:50	00:07:05		00:03:02	00:05:11		00:15:53	00:05:09		00:09:30	00:17:47		00:03:43	00:03:24		00:06:37	00:04:28		00:09:27	00:28:40		00:02:25	00:02:23		00:06:20	00:02:17		00:05:36	00:08:29
	00:04:43	00:18:32		00:07:33	00:05:25		00:03:40	00:01:28		00:08:14	00:08:49		00:16:41	00:09:09		00:15:14	00:05:40		00:03:12	00:03:12		00:05:07	00:03:02		00:08:29	00:07:51		00:04:20	00:02:45		00:04:00	00:06:11		00:05:39	00:05:07
	00:01:35	00:14:31		00:01:56	00:05:34		00:12:18	00:06:02		00:09:02	00:11:49		00:22:02	00:08:50		00:04:52	00:23:12		00:04:29	00:03:41		00:03:30	00:11:50		00:17:23	00:06:49		00:06:30	00:02:16		00:08:21	00:03:22		00:04:28	00:04:10
	00:04:16	00:29:12		00:06:15	00:06:51		00:02:40	00:13:00		00:02:36	00:02:57		00:04:21	00:07:21		00:21:32	00:19:02		00:05:19	00:02:57		00:05:26	00:22:36		00:13:11	00:04:28		00:02:58	00:03:20		00:02:16	00:08:43		00:16:31	00:05:28
	00:02:33	00:13:18		00:06:08	00:07:45		00:06:16	00:08:19		00:03:46	00:02:59		00:10:00	00:06:59		00:08:38	00:07:43		00:02:08	00:09:57		00:08:41	00:28:43		00:02:47	00:06:39		00:02:48	00:11:45		00:04:26	00:06:21		00:03:55	00:05:13
	00:10:22	00:09:03		00:06:34	00:08:45		00:15:53	00:10:52		00:03:29	00:01:56		00:04:20	00:06:03		00:12:00	00:23:28		00:03:12	00:04:58		00:05:24	00:02:58		00:00:56	00:10:03		00:04:25	00:04:22		00:09:36	00:05:03		00:04:07	00:05:17
	00:04:46	00:09:12		00:04:16	00:09:55		00:06:24	00:07:43		00:01:56	00:08:28		00:10:41	00:02:37		00:11:35	00:08:47		00:02:20	00:02:38		00:04:04	00:05:52		00:06:38	00:06:58		00:05:51	00:11:45		00:07:27	00:06:04		00:09:05	00:05:58
	00:12:46	00:10:23		00:03:40	00:19:09		00:19:37	00:10:21		00:06:46	00:11:47		00:20:22	00:12:45		00:03:43	00:10:19		00:03:00	00:06:45		00:06:20	00:05:43		00:14:12	00:07:21		00:01:54	00:04:18		00:05:05	00:05:24		00:04:40	00:05:58
	00:02:32	00:09:09		00:08:34	00:03:17		00:05:19	00:04:29		00:05:33	00:06:48		00:04:49	00:08:24		00:10:11	00:11:57		00:01:25	00:21:12		00:02:46	00:05:30		00:14:12	00:06:07		00:07:23	00:02:25		00:09:00	00:02:30		00:03:00	00:04:06
	00:09:31	00:02:56		00:02:47	00:04:17		00:03:20	00:11:00		00:02:22	00:22:24		00:08:31	00:02:15		00:04:20	00:27:46		00:09:31	00:13:03		00:01:51	00:02:30		00:10:35	00:01:19		00:05:09	00:02:16		00:03:07	00:11:40		00:09:55	00:06:12
	00:04:03	00:01:46		00:03:23	00:03:12		00:05:39	00:01:06		00:06:35	00:03:20		00:04:31	00:08:10		00:05:00	00:07:09		00:04:48	00:02:52		00:06:43	00:11:38		00:02:06	00:11:58		00:01:49	00:03:16		00:02:23	00:01:02		00:09:36	00:05:26
	00:17:41	00:08:05		00:07:13	00:01:20		00:06:04	00:11:00		00:03:26	00:02:40		00:05:36	00:03:38		00:14:43	00:04:41		00:01:43	00:12:41		00:01:38	00:02:17		00:05:36	00:13:17		00:00:42	00:07:08		00:05:58	00:04:07		00:22:49	00:14:48
	00:08:52	00:10:43		00:01:33	00:29:27		00:05:39	00:10:23		00:03:41	00:01:42		00:03:26	00:07:53		00:07:09	00:07:31		00:12:21	00:09:48		00:01:04	00:05:32		00:05:39	00:08:29		00:02:34	00:03:21		00:08:55	00:04:06		00:07:33	00:05:37
	00:08:15	00:11:50		00:16:36	00:07:57		00:05:58	00:06:33		00:04:19	00:09:51		00:00:45	00:03:07		00:07:33	00:12:38		00:01:33	00:08:58		00:07:24	00:08:41		00:02:54	00:05:07		00:01:47	00:07:23		00:09:04	00:05:34		00:08:45	00:07:50
	00:04:27	00:02:29		00:18:14	00:08:20		00:13:03	00:01:50		00:06:18	00:06:51		00:05:29	00:12:38		00:08:17	00:18:37		00:01:23	00:03:48		00:03:35	00:03:21		00:07:29	00:25:42		00:05:15	00:02:45		00:10:43	00:14:01		00:07:11	00:02:52
	00:08:08	00:02:39		00:07:08	00:04:03		00:09:56	00:04:06		00:02:37	00:04:47		00:04:44	00:02:08		00:06:25	00:15:10		00:02:55	00:07:33		00:07:15	00:05:12		00:05:26	00:11:03		00:03:40	00:04:01		00:03:52	00:08:47		00:15:38	00:02:26
	00:03:04	00:01:03		00:05:33	00:04:47		00:25:59	00:06:59		00:02:26	00:07:54		00:05:50	00:03:11		00:00:53	00:29:53		00:03:49	00:08:58		00:01:15	00:06:57		00:11:39	00:11:56		00:02:23	00:06:50		00:03:32	00:05:22		00:07:49	00:05:12
	00:25:33	00:18:28		00:20:12	00:02:54		00:05:58	00:05:09		00:02:09	00:27:43		00:02:25	00:02:52		00:08:50			00:01:17	00:14:49		00:08:55	00:06:51		00:07:31	00:12:04		00:02:02	00:02:36		00:01:48	00:09:50		00:03:27	00:04:29
	00:10:50	00:04:06		00:02:29	00:06:01		00:09:54	00:05:40		00:01:26	00:02:13		00:22:26	00:03:30		00:02:34	00:09:07		00:03:23	00:13:15		00:09:04	00:07:49		00:05:31	00:11:56		00:04:43	00:07:33		00:01:31	00:07:11		00:03:15	00:09:49
	00:04:31	00:03:04		00:06:38	00:03:46		00:05:05	00:06:31		00:01:37	00:04:20		00:03:35	00:03:12		00:18:32	00:07:34		00:06:36	00:03:48		00:10:43	00:30:00		00:09:46	00:08:24		00:03:18	00:05:41		00:04:54	00:07:00		00:09:47	00:07:33
	00:16:29	00:02:41		0:3:46	00:17:54		00:05:05	00:08:28		00:02:04	00:15:38		00:09:50	00:16:37		00:02:08	00:27:37		00:02:22	00:09:27		00:03:52	00:16:20		00:04:22	00:07:26		00:01:16	00:00:41		00:05:36	00:20:14		00:05:21	00:10:58
	00:13:23	00:30:00		00:07:24	00:11:41		00:07:06	00:07:41		00:06:18	00:05:51		00:08:14	00:09:17		00:15:30	00:19:27		00:01:28	00:08:07		00:03:32	00:02:54		00:06:21	00:10:13		00:04:16	00:07:34		00:12:42	00:04:36		00:14:37	00:05:46
	00:05:04	00:05:15		00:02:44	00:05:02		00:07:17	00:08:18		00:16:23	00:08:46		00:02:29	00:07:51		00:04:29	00:21:01		00:04:13	00:06:35		00:01:48	00:05:22		00:09:36	00:12:41		00:03:16	00:10:55		00:05:32	00:08:17		00:04:00	00:10:02
	00:04:18	00:05:15		00:11:20	00:03:59		00:05:26	00:12:48		00:06:58	00:05:04		00:01:56	00:06:54		00:07:52	00:02:05		00:03:12	00:05:04		00:01:31	00:09:50		00:22:49	00:06:20		00:05:02	00:01:50		00:07:57	00:09:06		00:07:14	00:26:33
	00:09:07	00:03:37		00:09:57	00:02:03		00:26:36	00:06:00		00:03:23	00:06:58		00:08:52	00:05:06		00:09:37	00:17:33		00:02:47	00:04:50		00:04:54	00:07:11		00:07:33	00:04:48		00:02:57	00:02:23		00:05:49	00:04:24		00:08:07	00:12:22
	00:09:31	00:01:35		00:04:53	00:05:47		00:03:52	00:07:57		00:12:01	00:08:05		00:15:38	00:06:26		00:05:11	00:20:01		00:00:47	00:05:41		00:05:36	00:07:00		00:08:45	00:04:29		00:03:01	00:05:52		00:05:00	00:08:24		00:10:34	00:09:02
	00:08:46	00:02:50		00:04:53	00:06:10		00:13:39	00:08:58		00:05:20	00:07:06		00:08:14	00:04:35		00:18:52	00:15:49		00:00:39	00:03:26		00:12:42	00:20:14		00:07:11	00:09:49		00:04:49	00:04:30		00:09:06	00:06:48		00:15:04	00:03:11
	00:08:58	00:09:46		00:07:29	00:05:33		00:09:47	00:06:11		00:02:58	00:09:25		00:11:38	00:01:21		00:03:24	00:12:07		00:00:41	00:07:37		00:05:32	00:04:36		00:15:38	00:07:33		00:02:04	00:10:58		00:05:07	00:04:54		00:08:07	00:09:40
	00:07:44	00:06:33		00:10:53	00:01:46		00:05:19	00:02:13		00:01:52	00:05:23		00:04:11	00:06:42		00:06:42	00:21:32		00:01:30	00:04:46		00:07:57	00:08:17		00:07:49	00:10:58		00:07:09	00:01:23		00:12:22	00:16:19		00:03:34	00:04:03
	00:01:38	00:30:07		00:07:01	00:03:21		00:07:57	00:02:48		00:02:11	00:10:17		00:02:27	00:03:36		00:04:41	00:13:24		00:03:25	00:04:21		00:05:49	00:09:06		00:03:27	00:05:46		00:06:30	00:03:21		00:03:54	00:04:38		00:05:02	00:18:45
	00:03:21	00:04:58		00:06:39	00:06:02		00:11:20	00:05:24		00:05:54	00:03:20		00:22:40	00:05:47		00:16:59	00:10:25		00:04:50	00:13:36		00:05:00	00:04:24		00:03:15	00:10:02		00:02:54	00:05:23		00:02:04	00:08:24		00:04:43	00:06:15
	00:18:37	00:28:16		00:01:56	00:04:02		00:05:29	00:08:00		00:01:39	00:06:50		00:02:17	00:01:54		00:07:05	00:05:19		00:03:47	00:02:38		00:09:06	00:08:24		00:09:47	00:26:33		00:04:20	00:05:42		00:02:49	00:02:52		00:09:05	00:06:19
	00:03:47	00:04:53		00:02:41	00:05:22		00:03:41	00:14:14		00:04:29	00:03:36		00:03:41	00:08:31		00:18:31	00:14:09		00:04:11	00:04:49		00:05:12	00:06:48		00:05:21	00:12:22		00:06:28	00:03:19		00:12:55	00:06:08		00:11:13	00:05:04
	00:06:16	00:04:25		00:12:27	00:05:17		00:08:40	00:07:19		00:02:43	00:02:40		00:06:04	00:08:21		00:07:24	00:09:30		00:02:17	00:01:28		00:02:26	00:04:54		00:14:37	00:09:02		00:03:39	00:04:54		00:06:30	00:07:40		00:04:11	00:04:46
	00:06:41	00:14:17		00:26:35	00:07:30		00:02:53	00:18:58		00:05:45	00:01:23		00:02:26	00:01:45		00:05:18	00:09:14		00:13:08	00:06:50		00:08:16	00:16:19		00:04:00	00:03:11		00:01:37	00:04:00		00:04:58	00:24:56		00:02:15	00:11:57
	00:08:00	00:02:20		00:07:26	00:05:55		00:07:40	00:03:02		00:07:31	00:02:36		00:02:25	00:03:12		00:07:56	00:17:57		00:02:37	00:02:36		00:05:45	00:04:38		00:07:14	00:09:40		00:03:49	00:04:22		00:07:28	00:05:20		00:08:25	00:09:37
	00:04:04	00:04:25		00:04:45	00:02:49		00:13:03	00:07:57		00:05:21	00:01:50		00:01:51	00:01:36		00:04:29	00:05:05		00:02:56	00:07:33		00:08:42	00:04:29		00:08:07	00:04:03		00:09:30	00:01:47		00:09:32	00:06:44		00:05:45	00:08:23
	00:03:31	00:05:26		00:05:07	00:05:22		00:05:22	00:07:32		00:03:12	00:03:53		00:01:03	00:12:18		00:16:35	00:02:25		00:04:03	00:05:41		00:02:02	00:08:50		00:02:45	00:18:45		00:06:41	00:02:49		00:26:54	00:04:24		00:26:47	00:07:28
	00:03:32	00:03:01		00:02:34	00:02:54		00:14:42	00:04:57		00:16:24	00:01:41		00:02:56	00:02:58		00:14:11	00:06:51		00:03:40	00:00:41		00:01:18	00:09:10		00:06:34	00:06:15		00:05:47	00:03:11		00:05:07	00:06:06		00:08:47	00:04:49
	00:06:34	00:04:27		00:07:24	00:02:32		00:05:02	00:08:09		00:04:50	00:04:44		00:01:48	00:02:13		00:13:29	00:05:13		00:02:23	00:07:34		00:13:24	00:03:42		00:03:00	00:06:19		00:04:16	00:02:28		00:02:58	00:05:54		00:06:14	00:09:44
	00:02:55	00:04:52		00:01:47	00:02:32		00:06:14	00:06:36		00:00:28	00:02:24		00:05:05	00:07:19		00:09:14	00:20:42		00:02:02	00:10:55		00:02:39	00:13:36		00:02:33	00:05:04		00:03:46	00:03:25		00:03:59	00:03:26		00:07:46	00:06:57
	00:05:39	00:05:22		00:04:50	00:02:39		00:04:51	00:02:49		00:17:56	00:00:37		00:08:39	00:06:09		00:17:28	00:08:00		00:04:43	00:01:50		00:26:54	00:10:33		00:01:09	00:04:46		00:06:23	00:01:47		00:18:30	00:05:19		00:05:54	00:03:58
	00:06:03	00:04:06		00:02:40	00:08:21		00:06:46	00:03:53		00:01:17	00:01:47		00:04:16	00:14:53		00:10:12	00:03:13		00:03:18	00:02:23		00:05:07	00:07:20		00:04:03	00:10:37		00:07:20	00:02:31		00:04:54	00:08:17		00:13:16	00:06:46
	00:08:56	00:19:52		00:06:35	00:06:54		00:03:49	00:05:52		00:08:51	00:03:28		00:06:14	00:03:51		00:17:47	00:18:01		00:05:30	00:13:05		00:02:58	00:02:06		00:06:12	00:10:48		00:09:19	00:03:03		00:02:09	00:06:00		00:01:59	00:03:21
	00:07:23	00:08:28		00:05:09	00:02:31		00:06:19	00:04:53		00:02:30	00:19:23		00:02:39	00:06:58		00:05:10	00:17:03		00:12:03	00:13:06		00:03:59	00:05:27		00:04:36	00:05:13		00:02:31	00:10:13		00:08:39	00:05:12		00:04:04	00:05:22
	00:04:45			00:02:42	00:27:35		00:06:03	00:04:21		00:06:46	00:03:22		00:17:09	00:17:18		00:10:40	00:19:29		00:02:02	00:06:31		00:18:30	00:08:01		00:05:17	00:06:48		00:04:37	00:06:08		00:05:01	00:05:27		00:00:40	00:11:10
	00:03:13			00:04:23	00:11:25		00:09:40	00:06:42		00:04:21	00:03:52		00:06:59	00:03:12		00:05:43			00:04:58	00:03:04		00:04:54	00:02:04		00:04:43	00:08:21		00:07:33	00:07:46		00:09:50	00:08:01		00:09:30	00:03:50
	00:02:42			00:12:04	00:02:54		00:02:46	00:16:31		00:05:39	00:04:13		00:04:32	00:06:27		00:06:01			00:02:04	00:07:25		00:02:09	00:03:28		00:26:47	00:08:43		00:05:31	00:03:31		00:07:10	00:02:04		00:11:44	00:05:32
	00:10:11			00:03:18	00:06:51		00:04:28	00:17:19		00:05:18	00:04:00		00:06:08	00:04:41		00:07:30			00:01:16	00:04:25		00:08:39	00:06:41		00:08:47	00:06:27		00:02:41	00:04:22		00:09:07	00:03:28		00:07:53	00:18:54
	00:25:18			00:02:54	00:06:33		00:05:41	00:07:11		00:04:11	00:04:53		00:04:43	00:03:49		00:02:20			00:04:16	00:11:31		00:05:01	00:15:10		00:06:14	00:06:28		00:02:20	00:01:49		00:04:41	00:06:41		00:03:18	00:16:59
	00:03:28			00:04:03	00:06:24		00:08:57	00:07:06		00:09:32	00:04:52		00:05:36	00:09:32		00:11:09			00:03:16	00:08:33		00:09:50	00:05:21		00:07:46	00:09:06		00:02:52	00:02:38		00:00:58	00:15:10		00:14:32	00:10:59
	00:12:48			00:03:41	00:05:57		00:06:25	00:09:05		00:05:21	00:03:45		00:06:19	00:03:00		00:03:31			00:05:02	00:11:19		00:07:10	00:10:11		00:05:54	00:18:54		00:05:36	00:06:02		00:02:52	00:05:21		00:15:38	00:12:58
	00:04:33			00:11:49	00:04:00		00:21:56	00:06:25		00:03:54	00:01:27		00:04:47	00:03:01		00:09:06			00:02:57	00:09:05		00:09:07	00:03:26		00:13:16	00:16:59		00:07:50	00:08:16		00:09:22	00:10:11		00:25:28	00:08:52
	00:06:33			00:07:17	00:02:59		00:04:06	00:04:47		00:05:38	00:04:22		00:22:37	00:05:50		00:19:45			00:03:01	00:09:11		00:04:41	00:05:09		00:01:59	00:10:59		00:07:22	00:05:25		00:04:44	00:03:26		00:07:18	00:10:52
	00:11:52			00:05:34	00:04:42		00:04:58	00:11:29		00:07:15	00:07:34		00:03:21	00:05:57		00:04:50			00:02:15	00:08:40		00:00:58	00:06:03		00:04:04	00:12:58		00:04:55	00:04:56		00:04:34	00:05:09		00:07:34	00:07:43
	00:04:32			00:01:38	00:03:39		00:11:14	00:04:31		00:05:23	00:01:46		00:08:20	00:03:43		00:22:37			00:05:38	00:05:52		00:00:49	00:05:06		00:00:40	00:08:52		00:02:37	00:11:12		00:04:27	00:06:03		00:08:08	00:06:46
	00:03:08			00:09:13	00:04:13		00:06:12	00:05:57		00:08:19	00:04:10		00:02:11	00:03:45		00:10:05			00:01:45	00:04:30		00:04:57	00:07:39		00:09:30	00:10:52		00:03:17	00:02:22		00:05:37	00:05:06		00:18:07	00:08:07
	00:07:37			00:01:04	00:07:43		00:12:24	00:08:19		00:02:17	00:03:43		00:11:51	00:06:33		00:05:50			00:01:23	00:10:58		00:04:52	00:07:59		00:11:44	00:07:43		00:04:32	00:04:19		00:07:18	00:07:39		00:05:17	00:19:04
	00:06:55			00:04:38	00:08:26		00:06:41	00:06:59		00:01:11	00:05:08		00:11:08	00:06:24		00:06:48			00:01:30	00:02:24		00:06:25	00:05:10		00:07:53	00:06:46		00:03:02	00:03:17		00:05:05	00:07:59		00:01:57	00:04:36
	00:02:20			00:03:57	00:15:56		00:05:20	00:03:39		00:03:54	00:01:15		00:02:30	00:15:00		00:08:28			00:04:36	00:04:35		00:04:11	00:12:04		00:03:18	00:08:07		00:08:33	00:03:50		00:01:43	00:03:32		00:06:46	00:03:50
	00:04:19			00:05:02	00:03:04		00:17:33	00:03:55		00:02:23	00:02:26		00:10:41	00:09:47		00:06:40			00:00:40	00:03:52		00:02:45	00:04:38		00:14:32	00:19:04		00:18:51	00:04:18		00:04:30	00:09:58		00:02:32	00:01:37
	00:14:52			00:05:43	00:10:28		00:07:19	00:02:19		00:03:59	00:02:49		00:06:26	00:04:14		00:07:54			00:00:23	00:08:49		00:09:16	00:07:14		00:15:38	00:04:36		00:14:14	00:03:27		00:03:32	00:11:27		00:09:05	00:12:05
	00:08:29			00:03:40	00:04:29		00:05:27	00:07:57		00:02:27	00:02:53		00:16:24	00:09:07		00:07:13			00:02:08	00:06:34		00:04:12	00:12:32		00:05:40	00:03:50		00:03:34	00:04:27		00:08:11	00:02:55		00:05:23	00:09:30
	00:05:25			00:05:05	00:25:41		00:04:04	00:05:09		00:01:58	00:04:19		00:10:04	00:07:08		00:13:00			00:07:05	00:06:38		00:05:25	00:05:45		00:03:16	00:01:37		00:02:52	00:06:43		00:04:12	00:08:31		00:03:45	00:04:43
	00:10:00			00:05:06	00:04:28		00:03:58	00:02:43		00:03:08	00:01:20		00:07:12	00:02:14		00:10:52			00:02:18	00:05:14		00:02:40	00:04:03		00:17:13	00:12:05		00:03:17	00:02:00		00:05:25	00:13:50		00:12:42	00:06:11
	00:04:53			00:11:02	00:03:23		00:03:38	00:08:54		00:05:12	00:02:15		00:21:44	00:03:59		00:06:04			00:02:44	00:05:47		00:06:04	00:04:31		00:21:46	00:09:30		00:05:03	00:02:52		00:02:40	00:03:30		00:18:06	00:05:41
	00:04:19			00:03:28	00:20:44		00:18:02	00:05:48		00:04:29	00:01:44		00:01:13	00:17:08		00:03:53			00:03:39	00:06:25		00:02:37	00:25:00		00:06:09	00:04:43		00:01:47	00:03:44		00:06:04	00:08:22		00:12:48	00:04:45
	00:01:26			00:01:11	00:10:52		00:04:17	00:05:13		00:00:40	00:07:25		00:07:01	00:03:06		00:02:28			00:01:54	00:07:15		00:01:00	00:26:45		00:05:26	00:06:11		00:02:56	00:02:10		00:02:37	00:13:30		00:17:54	00:07:03
	00:10:38			00:04:10	00:02:32		00:11:24	00:07:30		00:05:50	00:18:22		00:09:38	00:03:43		00:02:20			00:02:29	00:08:07		00:02:50	00:08:58		00:03:45	00:11:41		00:01:23	00:05:59		00:01:00	00:11:46		00:11:38	00:04:03
	00:09:29			00:06:46	00:02:32		00:07:26	00:10:02		00:06:07	00:08:07		00:05:50	00:04:30		00:18:59			00:05:08	00:07:46		00:06:50	00:03:09		00:12:42	00:05:25		00:03:30	00:06:49		00:02:50	00:03:26		00:16:49	00:01:59
	00:02:33			00:27:02	00:02:51		00:09:08	00:07:41		00:05:09	00:06:42		00:03:43	00:04:26		00:08:04			00:03:05	00:03:31			00:04:38		00:18:06	00:12:47		00:05:26	00:04:53		00:06:50	00:02:32		00:14:25	00:04:03
	00:16:45			00:05:45	00:05:31		00:10:35	00:30:07		00:06:34	00:02:53		00:01:25	00:01:52		00:02:07			00:02:31	00:04:22			00:08:43		00:12:48	00:08:49		00:02:25	00:03:21		00:06:15	00:04:50		00:01:26	00:03:05
	00:25:37			00:04:56	00:11:55			00:04:33		00:05:33	00:03:01		00:05:24	00:04:05		00:04:00			00:04:37	00:01:49			00:09:38		00:17:54	00:03:29		00:03:05	00:04:32		00:03:06	00:05:15		00:04:38	00:03:58
				00:07:51	00:02:54			00:03:32		00:03:06	00:01:50					00:05:27			00:07:33	00:02:38			00:06:17		00:11:38	00:07:34		00:15:09	00:04:58		00:04:01	00:04:31		00:07:58	00:03:49
				00:05:00	00:02:13			00:06:24		00:04:27	00:04:15					00:08:49			00:05:31	00:06:02			00:04:42		00:16:49	00:12:48		00:01:34	00:04:58		00:08:38	00:25:00		00:04:59	00:02:29
				00:04:26	00:13:25			00:07:05		00:06:47	00:05:18					00:02:20			00:02:41	00:08:16			00:06:46		00:14:25	00:14:55		00:02:21	00:02:27		00:09:43	00:26:45		00:06:08	00:05:56
				00:03:06	00:01:20			00:03:17		00:07:46	00:02:30					00:09:31			00:02:20	00:05:25			00:07:18		00:01:26	00:12:10		00:02:44	00:10:15		00:03:46	00:08:58		00:10:33	00:04:23
				00:04:19	00:02:53			00:08:29			00:07:58					00:03:39			00:11:12	00:04:56			00:11:38		00:04:38	00:07:29		00:04:13	00:11:12		00:05:45	00:03:09		00:04:46	00:05:23
				00:02:39	00:04:13			00:01:28			00:06:46					00:06:38			00:02:30	00:08:12					00:07:58	00:07:17		00:01:38	00:01:37		00:01:45	00:04:38		00:04:27	00:07:48
				00:05:08	00:09:10			00:03:09								00:07:30			00:09:11	00:09:30					00:04:59	00:12:29		00:05:05	00:04:42		00:05:32	00:08:43		00:03:30	00:12:48
				00:08:23	00:05:00			00:04:08								00:11:05			00:00:41	00:08:32					00:06:08	00:15:23		00:03:21	00:05:01		00:03:07	00:09:38		00:05:24	00:14:55
				00:24:42	00:04:46			00:06:00								00:25:23			00:02:52	00:06:10					00:10:33	00:11:53		00:03:41	00:05:28		00:05:32	00:06:17		00:04:43	00:12:10
				00:07:23	00:10:13			00:11:44								00:05:40			00:05:36	00:08:47					00:04:46	00:06:34		00:07:12	00:10:35			00:04:42		00:03:38	00:07:29
				00:06:15	00:03:03			00:12:44								00:12:28			00:07:50	00:09:20					00:04:27	00:06:04		00:02:51	00:16:35			00:06:46		00:04:17	00:07:17
				00:07:39	00:05:57											00:03:44			00:07:22	00:05:59						00:03:17		00:01:14	00:03:12			00:07:18		00:02:10	00:12:29
				00:05:22	00:04:02											00:08:51			00:04:55	00:04:42						00:02:13		00:02:23	00:04:10			00:11:38		00:12:50	00:15:23
				00:10:41	00:02:57											00:07:44			00:02:37	00:05:43						00:08:25		00:02:33	00:00:46			00:06:23		00:04:28	00:11:53
				00:06:05	00:05:25											00:06:36			00:00:55	00:09:05						00:09:41		00:06:35	00:00:54			00:04:57		00:14:26
				00:04:45	00:01:40											00:11:42			00:01:24	00:06:12						00:24:54		00:02:18	00:04:03			00:10:40		00:02:41	00:06:34
				00:02:58	00:06:56											00:07:44			00:01:19	00:08:11						00:04:20		00:01:16	00:01:45			00:05:43		00:02:09	00:06:04
				00:06:40	00:02:04											00:11:30			00:01:56	00:11:12								00:07:54	00:02:03			00:08:08		00:02:38	00:03:17
				00:20:40	00:07:42											00:04:21			00:04:09	00:02:22								00:07:27	00:06:55			00:03:25			00:02:13
				00:03:52	00:06:08											00:04:51			00:00:59	00:04:19								00:03:37	00:02:57			00:02:41			00:08:25
				00:02:13	00:10:12											00:03:50			00:00:42	00:05:25								00:08:18	00:03:08			00:09:07			00:09:41
				00:10:04	00:03:23											00:07:37			00:02:38	00:03:53								00:01:58	00:04:33			00:03:44			00:24:54
				00:02:47	00:17:52											00:05:58			00:01:10	00:05:30								00:03:30	00:06:02			00:09:20			00:04:20
					00:05:11														00:02:44	00:03:19								00:02:36	00:03:28			00:09:19			00:11:04
					00:04:42														00:04:43	00:07:09								00:07:26	00:02:32			00:06:13			00:06:30
					00:03:06														00:00:56	00:27:49								00:10:25				00:03:01			00:08:16
					00:02:15														00:02:32	00:03:27								00:01:37				00:06:49			00:03:52
					00:02:03														00:02:37	00:02:27								00:03:01				00:04:20			00:09:18
					00:01:43														00:03:39	00:10:15								00:03:28							00:02:16
					00:06:09														00:03:12	00:11:12								00:02:46							00:06:03
					00:01:43														00:01:34	00:01:37															00:02:52
																			00:02:21	00:04:42															00:12:45
																			00:02:44	00:05:01															00:07:57
																			00:04:13	00:05:28															00:11:26
																			00:01:38	00:09:58
																			00:05:05	00:05:33
																			00:02:00	00:06:10
																			00:01:35	00:03:03
																			00:01:42	00:05:35
																			00:03:21	00:07:32
																			00:03:41	00:05:32
																			00:07:12	00:04:24
																			00:02:51	00:11:32
																			00:01:14	00:05:32
																			00:02:23	00:03:31
																				00:05:47
																				00:10:35
																				00:16:35
