# Supplementary material for: The function of juvenile–adult transition axis in female sexual receptivity of Drosophila melanogaster
Source: eLife. 2024 Sep 6;12:RP92545. doi: 10.7554/eLife.92545 (PMC11379460; doi:10.7554/eLife.92545)
Supplement: Figure 4—source data 1. [file elife-92545-fig4-data1.xlsx]

## Sheet: Sheet1
Note: the blue cells indicate that the copulation did not success within 30min.
Figure 4	ethanol	20E		ethanol	20E
Genotpe	StartTime	StartTime	Genotpe	StartTime	StartTime
﹢/﹢	00:17:02	00:24:50	PTTHDelete/PTTHDelete	00:14:13	00:28:27
	00:17:02	00:19:33		00:01:24	00:03:05
	00:12:28	00:21:41		00:02:30	00:11:55
	00:26:25	00:08:22		00:02:45	00:14:56
	00:24:33	00:24:26		00:12:54	00:16:17
	00:24:35	00:11:13		00:08:11	00:25:21
	00:17:36	00:27:11		00:20:32	00:30:00
	00:25:29	00:11:24		00:12:34	00:12:08
	00:09:04	00:25:00		00:02:44	00:12:26
	00:27:18	00:10:39		00:09:24	00:24:45
	00:14:40	00:09:49		00:05:24	00:22:14
	00:04:12	00:26:29		00:21:27	00:06:47
	00:06:54	00:07:52		00:03:47	00:14:49
	00:07:50	00:15:25		00:11:12	00:08:52
	00:04:18	00:23:50		00:20:13	00:17:38
	00:25:17	00:05:31		00:29:28	00:29:53
	00:16:33	00:08:22		00:10:39	00:23:49
	00:19:19	00:26:42		00:07:28	00:20:17
	00:27:38	00:09:47		00:27:35	00:20:31
	00:14:43	00:06:25		00:01:48
	00:22:46	00:35:56		00:02:30
	00:04:20	00:20:15		00:03:21
	00:21:20	00:05:47		00:11:32
	00:04:39	00:11:46		00:02:22
		00:26:53		00:14:30
		00:22:41		00:01:37
		00:29:40		00:08:58
		00:21:25		00:21:31
		00:06:08		00:05:49
		00:09:44		00:05:28
		00:06:12		00:22:36
		00:11:37		00:01:17
		00:25:26		00:10:30
				00:05:37
				00:06:45
				00:05:50
				00:21:42
				00:15:58
				00:24:02
				00:14:41
				00:05:43
				00:07:41
