# Supplementary material for: The function of juvenile–adult transition axis in female sexual receptivity of Drosophila melanogaster
Source: eLife. 2024 Sep 6;12:RP92545. doi: 10.7554/eLife.92545 (PMC11379460; doi:10.7554/eLife.92545)
Supplement: Figure 5—figure supplement 2—source data 1. [file elife-92545-fig5-figsupp2-data1.xlsx]

## Sheet: Sheet1
Note: the blue cells indicate that the copulation did not success within 30min.
Figure5-S2-A						Figure5-S2-B
Genotpe	StartTime	Genotpe	StartTime	Genotpe	StartTime	Genotpe	Speed(mm/s)	Genotpe	Speed(mm/s)	Genotpe	Speed(mm/s)
UAS-EcR-RNAi/+	00:02:00	pC1-ss2-GAL4/UAS-EcR-RNAi	00:10:44	pC1-ss2-GAL4/+	00:03:40	UAS-EcR-A-RNAi/+	2.58	pC1-ss2-GAL4/UAS-EcR-A-RNAi	2.3	pC1-ss2-GAL4/+	2.99
	00:02:30		00:23:15		00:02:55		2.24		2.31		2.4
	00:03:50		00:18:27		00:03:25		3.07		2.87		2.22
	00:03:45		00:12:15		00:04:40		2.26		2.53		2.88
	00:03:05		00:02:55		00:07:09		2.54		3.01		2.31
	00:11:00		00:18:11		00:04:25		2.95		3.43		3.23
	00:02:55		00:04:40		00:07:55		2.53		3.12		1.44
	00:01:35		00:23:17		00:11:14		2.33		2.63		3.16
	00:09:45		00:25:06		00:06:16		2.59				4.1
	00:02:25		00:14:45		00:07:31		2.38				3.04
	00:05:50		00:08:46		00:08:35						2.35
	00:01:35		00:15:52		00:21:57
	00:06:20		00:09:08		00:08:00
	00:09:42		00:25:10		00:13:45
	00:12:28		00:13:56		00:09:10
	00:04:15		00:24:25		00:15:11
	00:07:04		00:26:12		00:10:25
	00:18:45		00:02:10		00:02:55
	00:02:36		00:08:35		00:18:47
	00:03:01		00:14:40		00:16:17
	00:03:36		00:04:20		00:04:36
	00:06:46		00:19:06		00:11:05
	00:02:55		00:08:06		00:05:05
	00:03:40		00:15:21		00:06:10
	00:03:35		00:02:15		00:04:30
	00:08:52		00:18:47		00:14:25
	00:03:55		00:12:06		00:17:06
	00:02:50		00:13:10		00:02:50
	00:01:45		00:20:11		00:13:05
	00:03:30		00:20:45		00:23:26
	00:04:10		00:17:17		00:09:30
	00:25:35		00:15:37		00:19:01
	00:06:30		00:04:45		00:02:20
	00:02:25		00:04:05		00:02:50
	00:02:15		00:13:45		00:10:15
	00:02:40		00:20:01		00:04:25
	00:04:50		00:03:16		00:26:37
	00:07:00		00:07:06		00:14:55
	00:06:30		00:02:00		00:08:25
	00:19:46		00:02:00		00:09:19
	00:03:40		00:22:30		00:12:29
	00:04:40		00:12:16		00:05:48
	00:05:15		00:28:51		00:11:20
	00:05:20		00:13:26		00:06:15
	00:06:55		00:10:46		00:03:06
	00:06:55		00:29:21		00:09:21
	00:16:48		00:04:30		00:29:56
	00:03:54		00:13:51		00:08:20
	00:05:39		00:25:32		00:06:40
	00:06:44				00:04:40
	00:03:11				00:01:55
	00:03:46				00:02:50
	00:06:14				00:11:30
	00:06:30				00:15:51
	00:09:41				00:13:20
	00:03:50				00:05:30
	00:03:40				00:04:55
	00:03:05				00:08:30
	00:18:46				00:02:21
	00:02:05				00:26:17
	00:02:15				00:19:37
	00:03:20				00:12:55
	00:06:30				00:20:26
	00:02:20				00:09:10
	00:02:15				00:06:30
	00:03:00				00:07:25
	00:03:20				00:16:01
	00:02:30				00:04:35
	00:01:50				00:09:00
	00:04:25				00:04:05
	00:03:20				00:11:25
	00:03:15				00:06:20
	00:04:10				00:12:35
	00:03:00				00:03:30
	00:02:45				00:03:45
	00:05:45				00:10:00
	00:04:55				00:07:10
	00:05:10				00:03:55
	00:09:50				00:11:04
	00:02:30				00:08:29
	00:03:10				00:05:40
	00:12:54				00:14:15
	00:04:13				00:09:20
	00:02:31				00:08:56
	00:01:21				00:25:10
	00:01:46				00:08:36
	00:08:31				00:16:11
	00:15:26				00:08:45
	00:05:20				00:10:20
	00:08:25				00:14:10
	00:02:55				00:16:52
	00:04:35				00:12:50
	00:02:45				00:12:50
	00:02:20				00:05:50
	00:00:55				00:14:06
	00:08:05				00:03:51
	00:02:10				00:01:36
	00:05:50				00:28:47
	00:02:00				00:07:40
	00:15:41				00:07:05
	00:07:05				00:08:35
	00:02:35				00:07:10
	00:03:20				00:07:25
	00:03:25				00:08:00
	00:07:35				00:05:20
	00:04:05				00:05:25
	00:04:15				00:09:40
	00:02:25				00:05:50
	00:03:30				00:10:50
	00:06:15				00:02:20
	00:03:15				00:05:20
	00:04:34				00:13:05
	00:15:05				00:13:35
	00:04:44				00:06:59
	00:05:11				00:25:44
	00:01:11				00:05:00
	00:02:21				00:03:20
	00:11:31				00:19:22
	00:17:28				00:05:35
	00:03:20				00:10:56
	00:02:25				00:08:35
	00:06:15				00:28:56
	00:02:20				00:05:00
	00:03:50				00:03:40
	00:04:20				00:09:45
					00:02:05
					00:28:38
					00:03:25
					00:07:46
					00:08:26
					00:05:21
					00:15:16
					00:04:40
					00:29:46
					00:12:15
					00:20:46
					00:22:39
					00:09:55
					00:18:35
					00:05:10
					00:04:05
					00:08:25
					00:12:00
