# Supplementary material for: The function of juvenile–adult transition axis in female sexual receptivity of Drosophila melanogaster
Source: eLife. 2024 Sep 6;12:RP92545. doi: 10.7554/eLife.92545 (PMC11379460; doi:10.7554/eLife.92545)
Supplement: Figure 5—figure supplement 3—source data 1. [file elife-92545-fig5-figsupp3-data1.xlsx]

## Sheet: Sheet1
Note: the blue cells indicate that the copulation did not success within 30min.
Figure5-S3-A						Figure5-S3-B						Figure5-S3-C						Figure5-S3-D						Figure5-S3-E						Figure5-S3-F
Genotpe	StartTime	Genotpe	StartTime	Genotpe	StartTime	Genotpe	StartTime	Genotpe	StartTime	Genotpe	StartTime	Genotpe	StartTime	Genotpe	StartTime	Genotpe	StartTime	Genotpe	StartTime	Genotpe	StartTime	Genotpe	StartTime	Genotpe	StartTime	Genotpe	StartTime	Genotpe	StartTime	Genotpe	StartTime	Genotpe	StartTime	Genotpe	StartTime
UAS-EcR-A-RNAi/+	00:02:46	vpoDN-ss1-GAL4/UAS-EcR-A-RNAi	00:08:49	vpoDN-ss1-GAL4/+	00:06:33	UAS-EcR-A-RNAi/+	00:02:46	vpoDN-ss2-GAL4/UAS-EcR-A-RNAi	00:03:26	vpoDN-ss2-GAL4/+	00:04:00	UAS-EcR-A-RNAi/+	00:02:46	vpoDN-ss3-GAL4/UAS-EcR-A-RNAi	00:03:15	vpoDN-ss3-GAL4/+	00:00:45	UAS-EcR-B1-RNAi/+	00:02:06	vpoDN-ss1-GAL4/UAS-EcR-B1-RNAi	00:05:00	vpoDN-ss1-GAL4/+	00:06:33	UAS-EcR-B1-RNAi/+	00:02:06	vpoDN-ss2-GAL4/UAS-EcR-B1-RNAi	00:02:45	vpoDN-ss2-GAL4/+	00:04:00	UAS-EcR-B1-RNAi/+	00:02:06	vpoDN-ss3-GAL4/UAS-EcR-B1-RNAi	00:03:54	vpoDN-ss3-GAL4/+	00:00:45
	00:03:46		00:05:11		00:02:18		00:03:46		00:04:42		00:02:05		00:03:46		00:02:30		00:01:50		00:03:26		00:24:25		00:02:18		00:03:26		00:03:20		00:02:05		00:03:26		00:04:39		00:01:50
	00:03:41		00:04:14		00:03:48		00:03:41		00:02:00		00:01:35		00:03:41		00:03:05		00:01:20		00:03:01		00:03:55		00:03:48		00:03:01		00:02:30		00:01:35		00:03:01		00:03:04		00:01:20
	00:04:30		00:01:41		00:03:09		00:04:30		00:04:40		00:02:12		00:04:30		00:04:40		00:03:35		00:02:41		00:02:45		00:03:09		00:02:41		00:01:35		00:02:12		00:02:41		00:04:50		00:03:35
	00:05:10		00:03:26		00:04:59		00:05:10		00:01:55		00:01:07		00:05:10		00:09:55		00:01:40		00:04:26		00:02:15		00:04:59		00:04:26		00:03:00		00:01:07		00:04:26		00:03:05		00:01:40
	00:02:25		00:05:56		00:08:05		00:02:25		00:01:15		00:02:42		00:02:25		00:01:40		00:02:15		00:02:06		00:22:56		00:08:05		00:02:06		00:09:06		00:02:42		00:02:06		00:04:20		00:02:15
	00:02:42		00:03:51		00:08:03		00:02:42		00:06:30		00:01:03		00:02:42		00:03:15		00:02:01		00:16:44		00:04:56		00:08:03		00:16:44		00:02:51		00:01:03		00:16:44		00:10:30		00:02:01
	00:00:46		00:04:41		00:06:27		00:00:46		00:14:30		00:03:04		00:00:46		00:02:55		00:01:46		00:06:26		00:01:56		00:06:27		00:06:26		00:03:16		00:03:04		00:06:26		00:05:47		00:01:46
	00:03:42		00:03:31		00:12:13		00:03:42		00:01:46		00:02:04		00:03:42		00:06:20		00:03:46		00:08:42		00:04:31		00:12:13		00:08:42		00:03:50		00:02:04		00:08:42		00:05:17		00:03:46
	00:03:36		00:10:12		00:02:00		00:03:36		00:09:46		00:04:50		00:03:36		00:01:16		00:03:31		00:10:37		00:19:13		00:02:00		00:10:37		00:08:00		00:04:50		00:10:37		00:07:57		00:03:31
	00:04:26		00:02:57		00:02:50		00:04:26		00:01:46		00:02:15		00:04:26		00:01:32		00:02:36		00:30:00		00:03:01		00:02:50		00:30:00		00:09:52		00:02:15		00:30:00		00:04:00		00:02:36
	00:08:11		00:02:17		00:04:36		00:08:11		00:30:00		00:01:40		00:08:11		00:03:16		00:03:56		00:21:52		00:03:16		00:04:36		00:21:52		00:02:30		00:01:40		00:21:52		00:01:50		00:03:56
	00:03:00		00:04:20		00:01:26		00:03:00		00:04:25		00:04:05		00:03:00		00:04:06		00:05:06		00:04:42		00:01:41		00:01:26		00:04:42		00:01:55		00:04:05		00:04:42		00:07:40		00:05:06
	00:07:05		00:07:40		00:08:12		00:07:05		00:03:05		00:02:05		00:07:05		00:06:06		00:04:06		00:07:43		00:06:06		00:08:12		00:07:43		00:04:05		00:02:05		00:07:43		00:04:15		00:04:06
	00:06:05		00:03:41		00:02:30		00:06:05		00:02:36		00:02:05		00:06:05		00:03:45		00:03:35		00:04:46		00:02:35		00:02:30		00:04:46		00:01:36		00:02:05		00:04:46		00:08:00		00:03:35
	00:07:25		00:05:31		00:05:35		00:07:25		00:01:41		00:02:40		00:07:25		00:03:30		00:03:45		00:03:11		00:26:34		00:05:35		00:03:11		00:06:41		00:02:40		00:03:11		00:01:31		00:03:45
	00:02:55		00:01:51		00:02:55		00:02:55		00:03:26		00:03:45		00:02:55		00:07:25		00:04:10		00:06:46		00:02:45		00:02:55		00:06:46		00:06:25		00:03:45		00:06:46		00:05:01		00:04:10
	00:16:21		00:03:35		00:11:15		00:16:21		00:02:30		00:01:30		00:16:21		00:03:37		00:05:20		00:04:55		00:04:15		00:11:15		00:04:55		00:01:40		00:01:30		00:04:55		00:03:36		00:05:20
	00:13:16		00:10:46		00:07:05		00:13:16		00:02:50		00:02:40		00:13:16		00:01:43		00:03:30		00:02:25		00:02:25		00:07:05		00:02:25		00:18:20		00:02:40		00:02:25		00:03:25		00:03:30
	00:06:30		00:02:35		00:02:35		00:06:30		00:01:45		00:03:05		00:06:30		00:04:24		00:06:15		00:04:45		00:12:06		00:02:35		00:04:45		00:02:25		00:03:05		00:04:45		00:08:00		00:06:15
	00:04:05		00:27:02		00:02:10		00:04:05		00:01:13		00:00:55		00:04:05		00:05:49		00:03:11		00:07:22		00:02:51		00:02:10		00:07:22		00:02:05		00:00:55		00:07:22		00:07:20		00:03:11
	00:05:19		00:03:27		00:03:35		00:05:19		00:02:23		00:05:30		00:05:19		00:08:30		00:03:46		00:04:17		00:09:26		00:03:35		00:04:17		00:03:35		00:05:30		00:04:17		00:05:07		00:03:46
	00:06:50		00:02:02		00:05:55		00:06:50		00:01:23		00:01:40		00:06:50		00:02:55		00:04:06		00:05:27		00:01:13		00:05:55		00:05:27		00:05:00		00:01:40		00:05:27		00:03:32		00:04:06
	00:01:14		00:01:41		00:06:22		00:01:14		00:01:00		00:01:40		00:01:14		00:03:45		00:10:11		00:03:05		00:01:38		00:06:22		00:03:05		00:04:15		00:01:40		00:03:05		00:02:32		00:10:11
	00:02:50		00:04:02		00:05:17		00:02:50		00:02:40		00:01:15		00:02:50		00:03:55		00:03:56		00:02:45		00:02:38		00:05:17		00:02:45		00:01:20		00:01:15		00:02:45		00:03:34		00:03:56
	00:05:55		00:01:22		00:02:02		00:05:55		00:09:05		00:03:45		00:05:55		00:07:05		00:06:11		00:04:00		00:04:03		00:02:02		00:04:00		00:09:45		00:03:45		00:04:00		00:07:00		00:06:11
	00:06:05		00:02:53		00:02:20		00:06:05		00:01:39		00:02:05		00:06:05		00:05:10		00:03:56		00:05:22		00:30:00		00:02:20		00:05:22		00:02:40		00:02:05		00:05:22		00:03:29		00:03:56
	00:02:56		00:01:38		00:06:30		00:02:56		00:06:50		00:02:00		00:02:56		00:06:30		00:16:39		00:14:37		00:10:19		00:06:30		00:14:37		00:01:15		00:02:00		00:14:37		00:07:35		00:16:39
	00:04:46		00:01:43		00:02:55		00:04:46		00:03:14		00:01:45		00:04:46		00:02:26		00:13:52		00:03:06		00:04:38		00:02:55		00:03:06		00:06:30		00:01:45		00:03:06		00:07:15		00:13:52
	00:04:21		00:01:49		00:01:53		00:04:21		00:05:37		00:05:10		00:04:21		00:04:36		00:08:56		00:03:40		00:04:11		00:01:53		00:03:40		00:04:25		00:05:10		00:03:40		00:04:35		00:08:56
	00:05:00		00:01:19		00:05:18		00:05:00		00:01:17		00:03:00		00:05:00		00:02:40		00:05:06		00:02:35		00:02:30		00:05:18		00:02:35		00:01:50		00:03:00		00:02:35		00:05:20		00:05:06
	00:03:50		00:01:54		00:03:33		00:03:50		00:27:21		00:02:25		00:03:50		00:01:05		00:01:05		00:02:50		00:03:05		00:03:33		00:02:50		00:02:25		00:02:25		00:02:50		00:05:00		00:01:05
	00:07:45		00:05:53		00:03:39		00:07:45		00:01:50		00:04:10		00:07:45		00:05:15		00:04:50		00:04:05		00:02:05		00:03:39		00:04:05		00:01:00		00:04:10		00:04:05		00:09:35		00:04:50
	00:03:50		00:05:23		00:03:34		00:03:50		00:10:32		00:01:32		00:03:50		00:07:20		00:04:25		00:03:55		00:03:20		00:03:34		00:03:55		00:01:55		00:01:32		00:03:55		00:06:47		00:04:25
	00:04:25		00:03:06		00:05:54		00:04:25		00:02:15		00:04:44		00:04:25		00:01:40		00:19:27		00:04:20		00:03:35		00:05:54		00:04:20		00:03:06		00:04:44		00:04:20		00:09:02		00:19:27
	00:01:40		00:02:51		00:02:06		00:01:40		00:05:25		00:01:47		00:01:40		00:04:35		00:03:40		00:02:40		00:05:25		00:02:06		00:02:40		00:02:01		00:01:47		00:02:40		00:04:32		00:03:40
	00:02:16		00:04:01		00:02:06		00:02:16		00:07:35		00:02:49		00:02:16		00:01:50		00:03:25		00:04:30		00:02:36		00:02:06		00:04:30		00:01:21		00:02:49		00:04:30		00:05:45		00:03:25
	00:02:56		00:05:21		00:02:51		00:02:56		00:04:55		00:04:14		00:02:56		00:02:15		00:02:15		00:05:20		00:02:31		00:02:51		00:05:20		00:04:50		00:04:14		00:05:20		00:06:00		00:02:15
	00:03:36		00:01:56		00:04:15		00:03:36		00:01:40		00:02:39		00:03:36		00:03:42		00:02:30		00:03:06		00:11:46		00:04:15		00:03:06		00:01:10		00:02:39		00:03:06		00:05:50		00:02:30
	00:05:10		00:06:16		00:02:15		00:05:10		00:00:55		00:14:11		00:05:10		00:03:02		00:04:10		00:03:41		00:04:51		00:02:15		00:03:41		00:05:15		00:14:11		00:03:41		00:03:00		00:04:10
	00:01:49		00:02:01		00:04:10		00:01:49		00:08:15		00:03:00		00:01:49		00:02:17		00:04:51		00:01:06		00:02:01		00:04:10		00:01:06		00:05:30		00:03:00		00:01:06		00:03:25		00:04:51
	00:03:30		00:00:57		00:03:11		00:03:30		00:02:46		00:01:45		00:03:30		00:03:11		00:02:11		00:02:06		00:24:23		00:03:11		00:02:06		00:05:15		00:01:45		00:02:06		00:04:45		00:02:11
	00:01:52		00:02:22		00:02:41		00:01:52		00:07:16		00:14:25		00:01:52		00:03:31		00:01:31		00:03:31		00:05:26		00:02:41		00:03:31		00:06:10		00:14:25		00:03:31		00:03:51		00:01:31
	00:02:32		00:01:42		00:01:56		00:02:32		00:05:56		00:03:00		00:02:32		00:10:06		00:02:01		00:01:56		00:02:11		00:01:56		00:01:56		00:03:01		00:03:00		00:01:56		00:03:06		00:02:01
	00:01:37		00:01:45		00:05:10		00:01:37		00:02:55		00:03:10		00:01:37		00:05:40		00:05:01		00:02:21		00:02:41		00:05:10		00:02:21		00:03:06		00:03:10		00:02:21		00:02:20		00:05:01
	00:30:00		00:03:50		00:02:50		00:30:00		00:02:10		00:03:30		00:30:00		00:02:15		00:02:46		00:07:16		00:03:15		00:02:50		00:07:16		00:01:31		00:03:30		00:07:16		00:05:30		00:02:46
	00:06:31		00:01:45		00:02:40		00:06:31		00:02:01		00:01:20		00:06:31		00:04:35		00:05:31		00:03:46		00:08:35		00:02:40		00:03:46		00:05:05		00:01:20		00:03:46		00:02:10		00:05:31
	00:11:51		00:02:06		00:01:45		00:11:51		00:03:01		00:04:15		00:11:51		00:02:37		00:06:00		00:06:02		00:04:30		00:01:45		00:06:02		00:06:44		00:04:15		00:06:02		00:02:57		00:06:00
	00:02:35		00:01:41		00:02:50		00:02:35		00:02:36		00:01:55		00:02:35		00:12:57		00:01:40		00:12:27		00:05:10		00:02:50		00:12:27		00:05:00		00:01:55		00:12:27		00:06:07		00:01:40
	00:09:00		00:01:41		00:01:00		00:09:00		00:02:50		00:06:50		00:09:00		00:06:07		00:02:00		00:22:22		00:07:30		00:01:00		00:22:22		00:05:15		00:06:50		00:22:22		00:02:47		00:02:00
	00:03:15		00:04:35		00:03:25		00:03:15		00:15:44		00:02:15		00:03:15		00:03:09		00:02:40		00:06:27		00:09:05		00:03:25		00:06:27		00:02:15		00:02:15		00:06:27		00:09:30		00:02:40
	00:04:35		00:06:25		00:04:05		00:04:35		00:03:00		00:03:35		00:04:35		00:01:24		00:06:51		00:07:03		00:09:51		00:04:05		00:07:03		00:03:05		00:03:35		00:07:03		00:05:49		00:06:51
	00:05:20		00:04:17		00:06:05		00:05:20		00:02:38		00:02:40		00:05:20		00:08:50		00:05:40		00:02:06		00:03:51		00:06:05		00:02:06		00:04:37		00:02:40		00:02:06		00:08:30		00:05:40
	00:04:10		00:04:02		00:02:52		00:04:10		00:02:48		00:02:30		00:04:10		00:02:00		00:02:20		00:24:33		00:04:26		00:02:52		00:24:33		00:07:40		00:02:30		00:24:33		00:06:25		00:02:20
	00:11:56		00:02:07		00:03:57		00:11:56		00:02:48		00:01:35		00:11:56		00:09:10		00:04:31		00:03:16		00:04:18		00:03:57		00:03:16		00:02:00		00:01:35		00:03:16		00:05:35		00:04:31
	00:02:55		00:05:32		00:02:17		00:02:55		00:01:50		00:03:25		00:02:55		00:06:20		00:07:16		00:02:10		00:03:18		00:02:17		00:02:10		00:04:25		00:03:25		00:02:10		00:02:45		00:07:16
	00:04:00		00:03:57		00:07:40		00:04:00		00:27:40		00:09:15		00:04:00		00:06:45		00:04:16		00:02:00		00:03:53		00:07:40		00:02:00		00:02:25		00:09:15		00:02:00		00:04:00		00:04:16
	00:03:34		00:06:07		00:01:20		00:03:34		00:01:45		00:03:25		00:03:34		00:04:10		00:03:21		00:04:40		00:02:03		00:01:20		00:04:40		00:08:00		00:03:25		00:04:40		00:03:50		00:03:21
	00:04:04		00:02:43		00:06:00		00:04:04		00:03:04		00:02:50		00:04:04		00:07:25		00:03:21		00:05:17		00:05:48		00:06:00		00:05:17		00:01:45		00:02:50		00:05:17		00:03:32		00:03:21
	00:28:58		00:01:33		00:18:57		00:28:58		00:02:59		00:02:35		00:28:58		00:03:41		00:02:41		00:04:42		00:30:00		00:18:57		00:04:42		00:05:20		00:02:35		00:04:42		00:14:22		00:02:41
	00:02:15		00:03:18		00:14:39		00:02:15		00:02:47		00:01:25		00:02:15		00:01:15		00:06:23		00:03:02		00:03:01		00:14:39		00:03:02		00:01:40		00:01:25		00:03:02		00:02:27		00:06:23
	00:07:52		00:28:30		00:04:03		00:07:52		00:03:47		00:01:17		00:07:52		00:07:56		00:06:23		00:03:05		00:02:31		00:04:03		00:03:05		00:13:11		00:01:17		00:03:05		00:10:15		00:06:23
	00:04:11		00:03:29		00:05:14		00:04:11		00:01:07		00:02:22		00:04:11		00:02:30		00:01:26		00:01:45		00:02:25		00:05:14		00:01:45		00:03:15		00:02:22		00:01:45		00:04:05		00:01:26
	00:03:51		00:02:14		00:02:04		00:03:51		00:02:40		00:03:47		00:03:51		00:04:00		00:12:58		00:02:50		00:03:30		00:02:04		00:02:50		00:00:50		00:03:47		00:02:50		00:07:55		00:12:58
	00:01:31		00:01:57		00:02:39		00:01:31		00:03:32		00:02:39		00:01:31		00:03:10		00:04:11		00:22:10		00:06:45		00:02:39		00:22:10		00:02:15		00:02:39		00:22:10		00:04:20		00:04:11
	00:10:00		00:03:41		00:03:32		00:10:00		00:04:22		00:02:59		00:10:00		00:07:35		00:01:00		00:02:41		00:03:00		00:03:32		00:02:41		00:04:01		00:02:59		00:02:41		00:04:50		00:01:00
	00:05:40		00:01:51		00:04:32		00:05:40		00:03:10		00:03:39		00:05:40		00:02:40		00:03:35		00:03:11		00:03:30		00:04:32		00:03:11		00:09:01		00:03:39		00:03:11		00:06:15		00:03:35
	00:04:15		00:26:17		00:03:22		00:04:15		00:02:50		00:01:30		00:04:15		00:03:55		00:03:15		00:02:20		00:01:25		00:03:22		00:02:20		00:08:16		00:01:30		00:02:20		00:08:57		00:03:15
	00:02:30		00:01:11		00:02:15		00:02:30		00:06:05		00:03:35		00:02:30		00:01:15		00:00:45		00:12:15		00:02:26		00:02:15		00:12:15		00:00:55		00:03:35		00:12:15		00:09:52		00:00:45
	00:04:35		00:04:31		00:01:40		00:04:35		00:08:10		00:03:00		00:04:35		00:02:42		00:02:20		00:03:24		00:02:21		00:01:40		00:03:24		00:03:20		00:03:00		00:03:24		00:08:52		00:02:20
	00:05:05		00:03:31		00:03:25		00:05:05		00:05:16		00:05:20		00:05:05		00:08:37		00:01:40		00:03:25		00:02:01		00:03:25		00:03:25		00:03:55		00:05:20		00:03:25		00:01:25		00:01:40
	00:03:16		00:13:01		00:06:22		00:03:16		00:05:46		00:05:05		00:03:16		00:01:57		00:03:45		00:01:55		00:07:37		00:06:22		00:01:55		00:06:10		00:05:05		00:01:55		00:01:50		00:03:45
	00:03:41		00:02:42		00:05:11		00:03:41		00:05:40		00:05:05		00:03:41		00:01:21		00:05:30		00:05:50		00:03:56		00:05:11		00:05:50		00:04:55		00:05:05		00:05:50		00:04:40		00:05:30
	00:03:11		00:05:25		00:02:16		00:03:11		00:04:15		00:02:40		00:03:11		00:03:21		00:04:40		00:02:40		00:04:56		00:02:16		00:02:40		00:05:25		00:02:40		00:02:40		00:06:42		00:04:40
	00:02:25		00:03:50		00:01:35		00:02:25		00:03:16		00:05:05		00:02:25		00:02:21		00:02:26		00:02:25		00:05:21		00:01:35		00:02:25		00:01:26		00:05:05		00:02:25		00:01:30		00:02:26
	00:08:45		00:03:20		00:01:00		00:08:45		00:03:36		00:10:34		00:08:45		00:01:55		00:04:36		00:01:46		00:08:11		00:01:00		00:01:46		00:03:51		00:10:34		00:01:46		00:02:42		00:04:36
	00:03:20		00:02:01		00:02:10		00:03:20		00:02:16		00:05:45		00:03:20		00:23:49		00:13:07		00:09:21		00:11:00		00:02:10		00:09:21		00:02:56		00:05:45		00:09:21		00:11:20		00:13:07
	00:01:52		00:05:21		00:01:50		00:01:52		00:01:50		00:09:37		00:01:52		00:03:20		00:05:26		00:06:31		00:04:55		00:01:50		00:06:31		00:01:05		00:09:37		00:06:31		00:05:09		00:05:26
	00:01:22		00:05:21		00:01:25		00:01:22		00:02:30		00:21:11		00:01:22		00:06:52		00:02:46		00:02:16		00:02:35		00:01:25		00:02:16		00:06:13		00:21:11		00:02:16		00:18:48		00:02:46
	00:00:57		00:04:55		00:03:05		00:00:57		00:04:20		00:03:25		00:00:57		00:02:16		00:04:20		00:04:11		00:03:05		00:03:05		00:04:11		00:00:55		00:03:25		00:04:11		00:03:30		00:04:20
	00:01:56		00:03:40		00:01:30		00:01:56		00:02:33		00:02:15		00:01:56		00:02:44		00:02:35		00:10:06		00:04:55		00:01:30		00:10:06		00:03:00		00:02:15		00:10:06		00:17:31		00:02:35
	00:02:26		00:03:15		00:06:25		00:02:26		00:03:28		00:01:10		00:02:26		00:06:04		00:03:50		00:17:28		00:03:15		00:06:25		00:17:28		00:08:45		00:01:10		00:17:28		00:05:45		00:03:50
	00:03:56		00:04:02		00:03:40		00:03:56		00:01:48		00:05:12		00:03:56		00:02:44		00:11:54		00:04:52		00:06:11		00:03:40		00:04:52		00:03:42		00:05:12		00:04:52		00:08:10		00:11:54
	00:06:20		00:03:47		00:03:42		00:06:20		00:02:20		00:04:25		00:06:20		00:02:50		00:02:31		00:04:46		00:14:14		00:03:42		00:04:46		00:05:02		00:04:25		00:04:46		00:06:50		00:02:31
	00:06:40		00:02:42		00:05:02		00:06:40		00:06:50		00:01:45		00:06:40		00:02:35		00:03:06		00:02:47		00:02:56		00:05:02		00:02:47		00:05:47		00:01:45		00:02:47		00:12:07		00:03:06
	00:02:55		00:04:07		00:02:22		00:02:55		00:23:12		00:12:26		00:02:55		00:03:20		00:03:06		00:15:48		00:03:53		00:02:22		00:15:48		00:01:20		00:12:26		00:15:48		00:03:57		00:03:06
	00:03:05		00:16:38		00:04:25		00:03:05		00:08:30		00:11:20		00:03:05		00:01:20		00:03:36		00:06:22		00:05:13		00:04:25		00:06:22		00:03:30		00:11:20		00:06:22		00:03:37		00:03:36
	00:04:55		00:01:38		00:02:55		00:04:55		00:03:19		00:04:50		00:04:55		00:03:20		00:05:01		00:04:36		00:04:43		00:02:55		00:04:36		00:04:45		00:04:50		00:04:36		00:04:00		00:05:01
	00:04:20		00:06:18		00:07:55		00:04:20		00:01:27		00:01:40		00:04:20		00:04:00		00:06:13		00:05:36		00:04:53		00:07:55		00:05:36		00:03:20		00:01:40		00:05:36		00:03:15		00:06:13
	00:25:10		00:02:59		00:03:48		00:25:10		00:22:11		00:02:25		00:25:10		00:02:16		00:08:18		00:05:11		00:02:38		00:03:48		00:05:11		00:01:30		00:02:25		00:05:11		00:08:20		00:08:18
	00:14:30		00:01:04		00:03:09		00:14:30		00:02:42		00:01:27		00:14:30		00:03:16		00:03:21		00:08:09		00:01:58		00:03:09		00:08:09		00:05:46		00:01:27		00:08:09		00:04:45		00:03:21
	00:05:34		00:02:24		00:02:58		00:05:34		00:01:20		00:04:27		00:05:34		00:02:31		00:02:56		00:04:00		00:06:23		00:02:58		00:04:00		00:06:00		00:04:27		00:04:00		00:03:50		00:02:56
	00:08:55		00:01:38		00:01:14		00:08:55		00:02:20		00:05:19		00:08:55		00:02:40		00:02:01		00:02:45		00:02:31		00:01:14		00:02:45		00:02:30		00:05:19		00:02:45		00:18:12		00:02:01
	00:03:05		00:01:02		00:03:39		00:03:05		00:02:05		00:03:29		00:03:05		00:16:11		00:06:46		00:09:02		00:07:24		00:03:39		00:09:02		00:03:51		00:03:29		00:09:02		00:03:16		00:06:46
	00:13:27		00:02:02		00:01:49		00:13:27		00:05:25		00:04:19		00:13:27		00:01:45		00:02:30		00:05:57		00:03:45		00:01:49		00:05:57		00:00:55		00:04:19		00:05:57		00:06:26		00:02:30
	00:14:11		00:02:36		00:02:06		00:14:11		00:02:51		00:01:15		00:14:11		00:01:47		00:01:20		00:04:42		00:06:20		00:02:06		00:04:42		00:01:35		00:01:15		00:04:42		00:02:20		00:01:20
	00:04:01		00:01:01		00:02:56		00:04:01		00:02:26		00:03:15		00:04:01		00:01:17		00:05:46		00:16:44		00:05:40		00:02:56		00:16:44		00:01:45		00:03:15		00:16:44		00:05:22		00:05:46
	00:05:01		00:01:51		00:03:31		00:05:01		00:03:36		00:06:15		00:05:01		00:18:57		00:03:00		00:02:35		00:04:05		00:03:31		00:02:35		00:04:15		00:06:15		00:02:35		00:02:32		00:03:00
	00:05:20		00:05:41		00:01:25		00:05:20		00:00:55		00:02:35		00:05:20		00:02:36		00:01:25		00:02:10		00:05:00		00:01:25		00:02:10		00:05:15		00:02:35		00:02:10				00:01:25
	00:03:25		00:04:25		00:00:45		00:03:25		00:06:20		00:02:00		00:03:25		00:02:15		00:03:10		00:05:37		00:04:21		00:00:45		00:05:37		00:10:51		00:02:00		00:05:37				00:03:10
	00:02:50		00:01:21		00:08:03		00:02:50		00:03:23		00:02:45		00:02:50		00:01:20		00:01:30		00:02:41		00:02:56		00:08:03		00:02:41		00:02:31		00:02:45		00:02:41				00:01:30
	00:04:05		00:10:46		00:03:36		00:04:05		00:27:12		00:11:25		00:04:05		00:02:12		00:03:40		00:05:12		00:02:41		00:03:36		00:05:12		00:02:10		00:11:25		00:05:12				00:03:40
	00:02:20		00:07:46		00:01:51		00:02:20		00:04:43		00:02:05		00:02:20		00:04:12		00:07:56		00:03:00		00:19:22		00:01:51		00:03:00		00:01:25		00:02:05		00:03:00				00:07:56
	00:04:05		00:03:40		00:01:56		00:04:05		00:04:20		00:03:05		00:04:05		00:07:32		00:03:26		00:04:29		00:05:26		00:01:56		00:04:29		00:10:23		00:03:05		00:04:29				00:03:26
	00:05:26		00:01:35		00:02:50		00:05:26		00:03:34		00:03:50		00:05:26		00:04:59		00:04:45		00:01:45		00:08:46		00:02:50		00:01:45		00:06:32		00:03:50		00:01:45				00:04:45
	00:09:36		00:07:00		00:02:20		00:09:36		00:04:22		00:02:35		00:09:36		00:03:09		00:04:45		00:04:50		00:03:46		00:02:20		00:04:50		00:02:42		00:02:35		00:04:50				00:04:45
	00:07:36		00:01:52		00:01:30		00:07:36		00:10:30		00:01:25		00:07:36		00:02:15		00:02:25		00:01:55		00:08:31		00:01:30		00:01:55		00:06:30		00:01:25		00:01:55				00:02:25
	00:02:30		00:04:17		00:01:35		00:02:30		00:01:22		00:03:20		00:02:30		00:02:30		00:07:56		00:01:50		00:06:50		00:01:35		00:01:50		00:03:40		00:03:20		00:01:50				00:07:56
	00:25:56		00:02:39		00:02:40		00:25:56		00:03:27		00:05:55		00:25:56		00:03:55		00:02:50		00:02:40		00:09:45		00:02:40		00:02:40		00:01:25		00:05:55		00:02:40				00:02:50
	00:02:22		00:04:24		00:00:55		00:02:22						00:02:22		00:02:20		00:04:11		00:06:40		00:01:50		00:00:55		00:06:40		00:05:00				00:06:40				00:04:11
	00:01:22				00:02:50		00:01:22						00:01:22		00:01:20		00:02:51		00:03:10		00:03:20		00:02:50		00:03:10						00:03:10				00:02:51
	00:02:12				00:01:05		00:02:12						00:02:12		00:06:46		00:02:31		00:02:51		00:01:30		00:01:05		00:02:51						00:02:51				00:02:31
	00:01:41				00:01:35		00:01:41						00:01:41		00:05:46		00:04:43		00:02:16		00:05:26		00:01:35		00:02:16						00:02:16				00:04:43
	00:05:36				00:01:05		00:05:36						00:05:36		00:05:46		00:06:13		00:02:51		00:07:16		00:01:05		00:02:51						00:02:51				00:06:13
	00:07:11				00:04:45		00:07:11						00:07:11				00:19:40		00:01:36		00:02:46		00:04:45		00:01:36						00:01:36				00:19:40
	00:04:30				00:05:15		00:04:30						00:04:30				00:03:41		00:02:16		00:08:39		00:05:15		00:02:16						00:02:16				00:03:41
	00:16:01				00:04:40		00:16:01						00:16:01				00:02:11		00:03:01		00:03:43		00:04:40		00:03:01						00:03:01				00:02:11
	00:03:35						00:03:35						00:03:35				00:02:50		00:14:13		00:02:48				00:14:13						00:14:13				00:02:50
	00:07:10						00:07:10						00:07:10				00:04:00		00:07:37		00:02:18				00:07:37						00:07:37				00:04:00
	00:06:00						00:06:00						00:06:00				00:01:45		00:06:27		00:03:26				00:06:27						00:06:27				00:01:45
	00:02:30						00:02:30						00:02:30						00:05:57		00:03:01				00:05:57						00:05:57
	00:05:10						00:05:10						00:05:10						00:04:07						00:04:07						00:04:07
	00:10:56						00:10:56						00:10:56						00:06:43						00:06:43						00:06:43
	00:06:29						00:06:29						00:06:29						00:09:33						00:09:33						00:09:33
	00:04:14						00:04:14						00:04:14						00:10:41						00:10:41						00:10:41
	00:04:04						00:04:04						00:04:04						00:04:56						00:04:56						00:04:56
	00:04:25						00:04:25						00:04:25						00:07:49						00:07:49						00:07:49
	00:04:10						00:04:10						00:04:10						00:08:39						00:08:39						00:08:39
	00:02:16						00:02:16						00:02:16						00:05:39						00:05:39						00:05:39
	00:02:01						00:02:01						00:02:01						00:01:37						00:01:37						00:01:37
	00:02:46						00:02:46						00:02:46						00:02:31						00:02:31						00:02:31
	00:01:50						00:01:50						00:01:50						00:02:25						00:02:25						00:02:25
	00:11:20						00:11:20						00:11:20						00:02:30						00:02:30						00:02:30
	00:03:50						00:03:50						00:03:50						00:02:10						00:02:10						00:02:10
	00:01:25						00:01:25						00:01:25						00:04:08						00:04:08						00:04:08
	00:02:35						00:02:35						00:02:35						00:01:06						00:01:06						00:01:06
																			00:08:22						00:08:22						00:08:22
																			00:03:34						00:03:34						00:03:34
																			00:03:05						00:03:05						00:03:05
																			00:08:30						00:08:30						00:08:30
																			00:22:48						00:22:48						00:22:48
																			00:05:30						00:05:30						00:05:30
																			00:06:10						00:06:10						00:06:10
																			00:02:40						00:02:40						00:02:40
																			00:03:20						00:03:20						00:03:20
																			00:04:35						00:04:35						00:04:35
