# Supplementary material for: The function of juvenile–adult transition axis in female sexual receptivity of Drosophila melanogaster
Source: eLife. 2024 Sep 6;12:RP92545. doi: 10.7554/eLife.92545 (PMC11379460; doi:10.7554/eLife.92545)
Supplement: Figure 5—figure supplement 4—source data 1. [file elife-92545-fig5-figsupp4-data1.xlsx]

## Sheet: Sheet1
Note: the blue cells indicate that the copulation did not success within 30min.
Figure5-S4
Genotpe	StartTime	Genotpe	StartTime	Genotpe	StartTime
pC1d-GAL4/+	00:01:15	UAS-EcR-A-RNAi	00:02:33	pC1d-GAL4/UAS-EcR-A-RNAi	00:05:06
	00:02:55		00:12:03		00:06:11
	00:03:20		00:03:06		00:03:30
	00:04:35		00:06:56		00:06:10
	00:04:20		00:01:31		00:02:30
	00:01:45		00:03:40		00:01:30
	00:02:10		00:13:06		00:07:35
	00:01:45		00:01:35		00:08:00
	00:03:45		00:01:56		00:01:30
	00:07:26		00:07:36		00:02:40
	00:06:01		00:07:36		00:14:20
	00:02:21		00:08:26		00:09:45
	00:16:11		00:05:19		00:08:10
	00:10:05		00:03:31		00:27:31
	00:06:35		00:16:47		00:03:05
	00:04:00		00:03:36		00:04:50
	00:04:05		00:12:48		00:01:45
	00:04:40		00:12:18		00:03:26
	00:05:55		00:07:33		00:06:01
	00:02:30		00:05:56		00:04:11
	00:03:20		00:07:11		00:08:05
	00:06:15		00:07:03		00:02:25
	00:05:10		00:04:07		00:04:05
	00:03:40		00:05:42		00:05:30
	00:02:50		00:03:57		00:04:55
	00:01:15		00:02:27		00:09:55
	00:02:55		00:03:26		00:00:51
	00:04:30		00:03:51		00:02:16
	00:11:00		00:06:26		00:02:35
	00:05:25		00:06:00		00:02:40
	00:05:55		00:01:35		00:02:20
	00:02:16		00:03:45		00:02:40
	00:05:06		00:04:56		00:12:55
	00:01:45		00:06:06		00:01:50
	00:23:51		00:01:41		00:01:55
	00:09:55		00:08:04		00:04:25
	00:08:30		00:04:12		00:09:15
	00:03:30		00:21:44		00:09:00
	00:02:40		00:03:11		00:05:45
	00:07:00		00:06:41		00:02:45
	00:04:20		00:04:16		00:05:10
	00:05:40		00:11:18		00:09:35
	00:03:25		00:06:18		00:02:51
	00:04:40		00:01:36		00:06:16
	00:01:35		00:12:11		00:06:46
	00:13:21		00:03:31		00:04:30
	00:04:45		00:05:27		00:02:25
	00:24:21		00:30:00		00:03:25
	00:02:35		00:02:07		00:05:30
	00:04:05		00:02:56		00:05:45
	00:04:05		00:02:56		00:02:51
	00:02:45		00:02:41		00:05:41
	00:01:45		00:03:30		00:00:41
	00:01:55		00:03:51		00:03:40
	00:04:20		00:11:16		00:10:45
	00:05:30		00:03:11		00:02:40
	00:06:25		00:04:33		00:04:10
	00:04:56		00:06:19		00:04:35
	00:04:11		00:02:40		00:03:50
	00:05:16		00:14:41		00:05:15
	00:19:26		00:04:21		00:04:00
	00:07:25		00:04:01		00:02:40
	00:04:45		00:05:38		00:01:20
	00:16:26		00:01:48		00:04:10
	00:01:30		00:03:43		00:03:50
	00:04:50		00:06:51		00:03:10
	00:01:45		00:02:06		00:03:26
	00:04:35		00:05:12		00:04:26
	00:04:40		00:01:51		00:03:31
	00:11:35		00:03:16		00:04:35
	00:04:35		00:05:34		00:25:56
	00:03:20		00:04:14		00:08:40
	00:06:16		00:05:36		00:06:10
	00:01:30		00:00:51		00:10:45
	00:05:00		00:03:26		00:05:45
	00:05:25		00:07:38		00:06:01
	00:04:00		00:04:23		00:02:41
	00:06:16		00:02:11		00:03:01
	00:04:26		00:02:51		00:06:25
	00:28:26		00:03:56		00:13:10
	00:04:45				00:13:55
	00:04:15				00:04:20
	00:09:20				00:06:05
	00:08:50				00:03:45
	00:06:15				00:05:11
	00:02:40				00:06:21
	00:14:40				00:04:45
	00:04:25
	00:09:06
	00:05:15
