# Supplementary material for: The function of juvenile–adult transition axis in female sexual receptivity of Drosophila melanogaster
Source: eLife. 2024 Sep 6;12:RP92545. doi: 10.7554/eLife.92545 (PMC11379460; doi:10.7554/eLife.92545)
Supplement: Figure 5—source data 1. [file elife-92545-fig5-data1.xlsx]

## Sheet: Sheet1
Note: the blue cells indicate that the copulation did not success within 30min.
Figure 5A						Figure 5B						Figure 5C						Figure 5D						Figure 5E						Figure 5F						Figure 5G						Figure 5H						Figure 5I
Genotpe	StartTime	Genotpe	StartTime	Genotpe	StartTime	Genotpe	StartTime	Genotpe	StartTime	Genotpe	StartTime	Genotpe	StartTime	Genotpe	StartTime	Genotpe	StartTime	Genotpe	StartTime	Genotpe	StartTime	Genotpe	StartTime	Genotpe	CI	Genotpe	CI	Genotpe	CI	Genotpe	egg	Genotpe	egg	Genotpe	egg	Genotpe	VPO	Genotpe	VPO	Genotpe	VPO	Genotpe	OE	Genotpe	OE	Genotpe	OE	Genotpe	StartTime
UAS-EcR-A-RNAi/+	00:02:39	pC1-ss2-GAL4/UAS-EcR-A-RNAi	00:06:24	pC1-ss2-GAL4/+	00:12:13	UAS-EcR-B1-RNAi/+	00:04:07	pC1-ss2-GAL4/UAS-EcR-B1-RNAi	00:14:46	pC1-ss2-GAL4/+	00:12:13	UAS-EcR-A-RNAi/+	00:04:43	pC1-ss1-GAL4/UAS-EcR-A-RNAi	00:16:30	pC1-ss1-GAL4/+	00:09:03	UAS-EcR-B1-RNAi/+	00:12:28	pC1-ss1-GAL4/UAS-EcR-B1-RNAi	00:04:01	pC1-ss1-GAL4/+	00:09:03	UAS-EcR-A-RNAi/+	0.959267	pC1-ss2-GAL4/UAS-EcR-A-RNAi	0.943433	pC1-ss2-GAL4/+	0.999067	UAS-EcR-A-RNAi/+	0	pC1-ss2-GAL4/UAS-EcR-A-RNAi	27	pC1-ss2-GAL4/+	42	UAS-EcR-A-RNAi/+	3	pC1-ss2-GAL4/UAS-EcR-A-RNAi	1	pC1-ss2-GAL4/+	2	UAS-EcR-A-RNAi/+	2	pC1-ss2-GAL4/UAS-EcR-A-RNAi	4	pC1-ss2-GAL4/+	2	+/+;UAS-EcR-A-RNAi-9328/+	00:02:25
	00:11:15		00:15:38		00:18:14		00:17:14		00:04:15		00:18:14		00:12:39		00:06:05		00:02:33		00:02:20		00:10:27		00:02:33		0.9477		0.945633		0.918267		0		20		0		2		8		0		3		5		13		00:02:25
	00:06:08		00:10:55		00:06:12		00:28:56		00:17:02		00:06:12		00:03:21		00:05:10		00:03:23		00:04:05		00:05:12		00:03:23		0.9334		0.994667		1		0		25		48		1		2		0		0		7		7		00:28:45
	00:19:23		00:14:27		00:05:29		00:13:56		00:14:51		00:05:29		00:04:51		00:12:16		00:22:21		00:03:45		00:08:13		00:22:21		0.9928		0.9202		0.960067		2		72		49		2		2		1		0		1		0		00:02:47
	00:04:17		00:11:57		00:06:00		00:04:58		00:11:52		00:06:00		00:01:26		00:10:01		00:03:10		00:05:25		00:04:12		00:03:10		0.672267		0.931567		0.899		42		56		59		1		2		0		0		1		0		00:08:47
	00:06:49		00:06:55		00:04:31		00:19:15		00:14:28		00:04:31		00:01:45		00:25:35		00:19:25		00:10:50		00:05:05		00:19:25		0.997833		0.9983		0.956033		13		47		41		3		8		0		0		6		4		00:04:40
	00:04:01		00:16:22		00:03:12		00:15:22		00:19:02		00:03:12		00:02:50		00:05:36		00:03:30		00:04:25		00:05:10		00:03:30		0.9973		0.9961		0.992133		0		56		59		1		4		7		0		7		16		00:05:57
	00:06:34		00:13:01		00:26:47		00:04:59		00:13:04		00:26:47		00:02:50		00:05:06		00:04:45		00:10:25		00:03:01		00:04:45		0.982167		0.795367		0.922333		0		46		0		0		0		1		0		0		18		00:07:59
	00:10:20		00:12:43		00:05:08		00:02:24		00:20:52		00:05:08		00:00:50		00:10:47		00:01:10		00:02:00		00:09:48		00:01:10								5		56		54														00:06:29
	00:23:04		00:27:16		00:10:33		00:08:39		00:08:11		00:10:33		00:01:26		00:01:25		00:03:13		00:11:20		00:04:34		00:03:13								0		63		61														00:10:40
	00:04:04		00:26:40		00:18:04		00:16:11		00:01:57		00:18:04		00:04:06		00:04:35		00:01:46		00:08:25		00:11:28		00:01:46								0		45		67														00:01:49
	00:05:07		00:16:11		00:22:20		00:03:08		00:15:43		00:22:20		00:03:42		00:04:05		00:02:16		00:03:24		00:02:04		00:02:16								11		65		48														00:08:58
	00:03:11		00:19:48		00:27:57		00:14:17		00:12:04		00:27:57		00:11:33		00:27:49		00:04:25		00:01:56		00:09:33		00:04:25								0		36		52														00:04:52
	00:16:16		00:29:03		00:22:15		00:06:45		00:25:44		00:22:15		00:06:17		00:02:51		00:12:40		00:05:50		00:01:54		00:12:40								10		29		57														00:04:21
	00:01:46		00:18:24		00:04:03		00:17:45		00:22:43		00:04:03		00:07:24		00:02:45		00:06:55		00:05:10		00:05:45		00:06:55								0		58		48														00:13:20
	00:02:23		00:28:26		00:17:50		00:04:57		00:12:44		00:17:50		00:05:19		00:03:15		00:15:46		00:04:45		00:05:30		00:15:46								7		59		41														00:08:46
	00:04:06		00:12:50		00:15:00		00:07:24		00:28:55		00:15:00		00:04:34		00:09:05		00:07:41		00:01:38		00:01:17		00:07:41								0		27		65														00:02:29
	00:04:03		00:24:30		00:07:52		00:16:01		00:12:42		00:07:52		00:01:55		00:02:46		00:05:40		00:05:08		00:02:32		00:05:40								0		52																00:03:03
	00:04:10		00:08:37		00:08:21		00:03:17		00:26:51		00:08:21		00:03:15		00:04:56		00:04:37		00:19:29		00:01:37		00:04:37								15		51																00:07:24
	00:04:24		00:12:04		00:01:39		00:15:38		00:19:48		00:01:39		00:03:25		00:09:46		00:13:28		00:19:42		00:02:10		00:13:28								0																		00:10:25
	00:04:13		00:09:01		00:09:29		00:21:29		00:24:58		00:09:29		00:02:45		00:08:08		00:02:27		00:02:40		00:02:43		00:02:27								0																		00:18:38
	00:03:02		00:05:59		00:19:23		00:09:12		00:17:43		00:19:23		00:01:40		00:15:58		00:02:58		00:26:04		00:11:44		00:02:58								0																		00:02:58
	00:07:39		00:11:50		00:08:30		00:02:07		00:13:01		00:08:30		00:05:50		00:02:07		00:05:33		00:04:06		00:03:11		00:05:33								0																		00:05:46
	00:07:11		00:27:20		00:08:44		00:03:41		00:21:28		00:08:44		00:12:15		00:06:05		00:04:36		00:04:53		00:06:01		00:04:36								0																		00:11:43
	00:04:03		00:27:56		00:09:42		00:07:18		00:25:22		00:09:42		00:00:58		00:09:41		00:25:09		00:05:20		00:02:30		00:25:09								0																		00:11:26
	00:06:30		00:22:26		00:07:11		00:09:45		00:24:16		00:07:11		00:03:34		00:06:22		00:02:48		00:04:20		00:05:50		00:02:48								14																		00:08:01
	00:19:06		00:16:16		00:20:34		00:07:32		00:09:45		00:20:34		00:07:38		00:09:48		00:04:28		00:03:45		00:07:09		00:04:28								2																		00:20:06
	00:07:18		00:25:09		00:12:36		00:12:12		00:01:31		00:12:36		00:03:06		00:07:52		00:06:58		00:02:16		00:03:17		00:06:58								0																		00:11:03
	00:01:22		00:28:15		00:08:36		00:04:57		00:10:50		00:08:36		00:03:18		00:11:28		00:03:04		00:01:32		00:05:17		00:03:04								0																		00:08:00
	00:06:46		00:04:43		00:05:04		00:04:24		00:03:29		00:05:04		00:03:49		00:12:02		00:06:02		00:06:05		00:23:29		00:06:02								0																		00:05:31
	00:07:50		00:17:50		00:28:50		00:28:10		00:09:28		00:28:50		00:18:29		00:02:01		00:04:22		00:01:50		00:04:57		00:04:22								16																		00:03:15
	00:03:52		00:08:31		00:18:31		00:11:44		00:29:15		00:18:31		00:02:11		00:04:00		00:03:40		00:04:20		00:25:56		00:03:40								0																		00:08:38
	00:03:46		00:15:59		00:05:02		00:09:16		00:10:07		00:05:02		00:03:27		00:02:00		00:05:35		00:02:35		00:10:25		00:05:35								0																		00:02:56
	00:02:02		00:18:46		00:17:08		00:05:43		00:03:05		00:17:08		00:07:38		00:04:40		00:03:25		00:06:20		00:04:15		00:03:25								0																		00:06:38
	00:04:04		00:25:44		00:17:24		00:04:08		00:23:17		00:17:24		00:03:10		00:11:37		00:06:03		00:04:10		00:07:16		00:06:03																										00:06:38
	00:07:21		00:27:31		00:11:04		00:04:55		00:03:15		00:11:04		00:03:05		00:21:10		00:06:36		00:02:20		00:02:56		00:06:36																										00:02:19
	00:01:56		00:09:33		00:04:23		00:02:25		00:22:35		00:04:23		00:03:10		00:03:41		00:01:32		00:06:10		00:03:13		00:01:32																										00:03:04
	00:05:38		00:19:31		00:15:17		00:02:53		00:06:08		00:15:17		00:01:41		00:06:55		00:03:00		00:01:45		00:04:32		00:03:00																										00:08:46
	00:17:08		00:03:56		00:13:33		00:03:10		00:09:35		00:13:33		00:03:36		00:14:05		00:07:45		00:02:01		00:01:22		00:07:45																										00:01:07
	00:19:58		00:10:32		00:13:44		00:09:50		00:08:43		00:13:44		00:03:21		00:05:16		00:03:40		00:01:56		00:02:50		00:03:40																										00:02:34
	00:12:45				00:13:35		00:23:35		00:12:26		00:13:35		00:03:07		00:02:26		00:06:23		00:03:15		00:05:15		00:06:23																										00:02:05
	00:09:32				00:05:19		00:08:02		00:22:52		00:05:19		00:05:32		00:07:31		00:02:23		00:04:30		00:06:25		00:02:23																										00:04:08
	00:03:50				00:06:51		00:02:29		00:11:06		00:06:51		00:08:09		00:09:23		00:08:33		00:02:15		00:01:52		00:08:33																										00:22:06
	00:03:14				00:02:47		00:04:30		00:07:42		00:02:47		00:03:44		00:03:34		00:03:45		00:03:58		00:07:37		00:03:45																										00:03:04
	00:03:43				00:14:12		00:05:31		00:23:28		00:14:12		00:03:49		00:03:05		00:03:00		00:02:18		00:02:27		00:03:00																										00:11:43
	00:05:03				00:06:52		00:09:18		00:14:32		00:06:52		00:04:04		00:03:50		00:05:20		00:02:28		00:01:30		00:05:20																										00:04:01
	00:04:09				00:05:23		00:02:33		00:12:40		00:05:23		00:03:55		00:02:54		00:03:05		00:01:55		00:10:28		00:03:05																										00:10:08
	00:11:41				00:03:33		00:12:49		00:13:37		00:03:33		00:03:30		00:04:15		00:03:30		00:09:05		00:03:52		00:03:30																										00:05:09
	00:07:44				00:20:18		00:03:59		00:09:07		00:20:18		00:07:30		00:15:51		00:04:55		00:08:15		00:07:44		00:04:55																										00:06:14
	00:06:38				00:02:57		00:04:00		00:23:22		00:02:57		00:02:20		00:03:56		00:02:23		00:07:59		00:02:27		00:02:23																										00:06:36
	00:02:21				00:07:02		00:04:36		00:18:06		00:07:02		00:01:40		00:02:05		00:15:55		00:03:24		00:10:27		00:15:55																										00:03:15
	00:05:13				00:03:27		00:03:42		00:22:25		00:03:27		00:07:00		00:05:06		00:05:58		00:03:35		00:24:19		00:05:58																										00:03:05
	00:03:02				00:02:21		00:19:18		00:06:57		00:02:21		00:04:09		00:08:32		00:04:00		00:08:15		00:04:52		00:04:00																										00:09:05
	00:01:31				00:10:00		00:03:11		00:22:58		00:10:00		00:06:54		00:07:37		00:07:31		00:04:35		00:06:48		00:07:31																										00:01:54
	00:06:21				00:02:12		00:01:41		00:10:44		00:02:12		00:04:59		00:06:25		00:09:41		00:02:40		00:02:36		00:09:41																										00:03:58
	00:03:38				00:13:33		00:05:17		00:11:58		00:13:33		00:06:24		00:02:00		00:03:25		00:05:07		00:06:25		00:03:25																										00:05:28
	00:10:38				00:17:37		00:08:26		00:04:34		00:17:37		00:07:16		00:15:02		00:04:37		00:09:50		00:02:55		00:04:37																										00:05:02
	00:04:17				00:11:15		00:02:55		00:09:45		00:11:15		00:05:48		00:06:42		00:02:47		00:01:40		00:13:30		00:02:47																										00:16:21
	00:06:56				00:08:31		00:05:06		00:20:12		00:08:31		00:02:50		00:10:27		00:07:13		00:03:00		00:09:06		00:07:13																										00:05:35
	00:06:57				00:02:29		00:05:07		00:07:31		00:02:29		00:04:02		00:15:21		00:05:55		00:05:45		00:06:13		00:05:55																										00:13:20
	00:06:36				00:05:01		00:07:56		00:13:46		00:05:01		00:08:24		00:05:20		00:04:56		00:01:45		00:16:36		00:04:56																										00:17:07
	00:07:06				00:15:34		00:02:02		00:20:36		00:15:34		00:01:27		00:04:05		00:01:18		00:02:55		00:04:53		00:01:18																										00:17:07
	00:21:46				00:16:37		00:11:22		00:10:21		00:16:37		00:26:04		00:08:21		00:19:26		00:03:15		00:04:27		00:19:26																										00:03:54
	00:01:50				00:05:32		00:03:20		00:12:31		00:05:32		00:01:34		00:03:46		00:03:51		00:02:50		00:07:30		00:03:51																										00:05:43
	00:04:26				00:03:51		00:02:33		00:08:20		00:03:51		00:05:20		00:05:36		00:02:48		00:24:48		00:08:05		00:02:48																										00:03:04
	00:06:11				00:02:55		00:03:56		00:02:54		00:02:55		00:01:50		00:02:04		00:10:40		00:01:56		00:15:23		00:10:40																										00:11:16
	00:09:12				00:21:44		00:07:18		00:15:32		00:21:44		00:01:50		00:04:32		00:04:07		00:03:31		00:02:27		00:04:07																										00:05:36
	00:16:45				00:16:17		00:05:48		00:15:09		00:16:17		00:01:51		00:06:10		00:27:13		00:01:49		00:06:40		00:27:13																										00:03:45
	00:04:33				00:01:31		00:18:54		00:09:27		00:01:31		00:02:21		00:04:05		00:04:22		00:18:51		00:06:15		00:04:22																										00:02:56
	00:06:12				00:12:50		00:18:52		00:03:16		00:12:50		00:02:31		00:03:05		00:04:17		00:04:35		00:06:30		00:04:17																										00:02:31
	00:04:48				00:05:02		00:08:52		00:16:14		00:05:02		00:04:02		00:06:36		00:03:40		00:03:23		00:01:35		00:03:40																										00:02:53
	00:20:43				00:20:38		00:03:55		00:03:45		00:20:38		00:06:47		00:08:40		00:09:45		00:03:23		00:03:47		00:09:45																										00:04:14
	00:05:05				00:06:12		00:06:00		00:08:14		00:06:12		00:02:57		00:06:16		00:03:10		00:02:28		00:03:16		00:03:10																										00:02:24
	00:16:52				00:07:13		00:07:57		00:08:59		00:07:13		00:00:58		00:02:25		00:08:23		00:01:30		00:14:12		00:08:23																										00:03:35
	00:13:01				00:11:24		00:07:16		00:19:25		00:11:24		00:02:39		00:06:14		00:17:26		00:05:20		00:02:56		00:17:26																										00:06:35
	00:06:30				00:23:46		00:02:48		00:05:54		00:23:46		00:03:04		00:02:55		00:03:35		00:10:59		00:06:35		00:03:35																										00:02:51
	00:02:52				00:05:17		00:02:12		00:03:38		00:05:17		00:03:55		00:09:50		00:04:00		00:06:34		00:06:35		00:04:00																										00:02:19
	00:03:42				00:24:21		00:19:47		00:18:58		00:24:21		00:01:35		00:09:05		00:05:50		00:05:57		00:16:31		00:05:50																										00:03:26
	00:04:39				00:02:52		00:05:20		00:22:09		00:02:52		00:03:10		00:05:20		00:01:50		00:07:20		00:04:00		00:01:50																										00:16:33
	00:04:09				00:22:18		00:03:12		00:23:59		00:22:18		00:21:45		00:07:27		00:07:43		00:06:10		00:24:51		00:07:43
	00:09:34				00:27:04		00:03:24		00:24:42		00:27:04		00:06:45		00:12:27		00:05:18		00:02:45		00:07:50		00:05:18
	00:04:19				00:11:50		00:23:24		00:04:38		00:11:50		00:02:50		00:04:01		00:11:20		00:03:10		00:03:55		00:11:20
	00:02:30				00:16:50		00:19:40		00:13:07		00:16:50		00:03:59		00:06:50		00:08:00		00:12:17		00:02:45		00:08:00
	00:28:46				00:03:54		00:20:31		00:06:30		00:03:54		00:06:04		00:06:55		00:06:20		00:02:20		00:01:45		00:06:20
	00:13:47				00:18:22		00:23:12		00:14:29		00:18:22		00:01:43		00:16:51		00:02:40		00:01:20		00:08:05		00:02:40
	00:02:27				00:04:45		00:10:38		00:11:19		00:04:45		00:10:06		00:05:56		00:10:25		00:05:30		00:04:07		00:10:25
	00:04:18				00:07:37		00:03:18		00:08:05		00:07:37		00:03:16		00:03:11		00:07:50		00:06:25		00:02:42		00:07:50
	00:07:14				00:06:47		00:02:06		00:10:51		00:06:47		00:29:32		00:07:16		00:13:14		00:02:45		00:20:56		00:13:14
	00:10:23				00:05:35		00:10:18		00:08:19		00:05:35		00:03:18		00:05:45		00:07:01		00:05:55		00:01:40		00:07:01
	00:08:54				00:11:14		00:04:27				00:11:14		00:10:27		00:07:03		00:03:42		00:02:10		00:05:15		00:03:42
	00:06:16				00:13:48		00:01:28				00:13:48		00:07:10		00:05:04		00:09:35		00:01:45		00:03:25		00:09:35
	00:13:29				00:28:16		00:04:55				00:28:16		00:02:35		00:03:50		00:07:35		00:07:05		00:02:06		00:07:35
	00:01:57				00:05:08		00:08:02				00:05:08		00:02:55		00:04:40		00:03:40		00:02:10		00:03:21		00:03:40
	00:29:39				00:12:07		00:02:18				00:12:07		00:01:01		00:09:21		00:17:27		00:08:00		00:03:21		00:17:27
	00:18:06				00:04:41		00:02:39				00:04:41		00:01:31				00:05:17		00:05:59		00:09:22		00:05:17
	00:04:30				00:06:18		00:01:58				00:06:18		00:03:26				00:05:17		00:03:26				00:05:17
	00:04:13				00:09:12		00:02:45				00:09:12		00:03:32				00:03:32		00:06:55				00:03:32
	00:04:00				00:16:10		00:04:35				00:16:10		00:03:07				00:05:45		00:02:45				00:05:45
	00:02:23				00:11:49		00:02:30				00:11:49		00:01:49				00:04:49		00:05:10				00:04:49
	00:03:16				00:06:30		00:07:06				00:06:30		00:02:59				00:03:56		00:06:03				00:03:56
	00:05:55				00:08:47		00:05:08				00:08:47		00:04:59				00:04:27		00:02:28				00:04:27
	00:09:09				00:08:21		00:06:54				00:08:21		00:02:10				00:02:48		00:03:23				00:02:48
	00:09:20				00:06:08		00:03:46				00:06:08		00:06:15				00:03:01		00:01:20				00:03:01
	00:04:48				00:03:58		00:02:14				00:03:58		00:05:50				00:04:12		00:02:57				00:04:12
	00:03:14				00:09:46		00:02:50				00:09:46		00:01:55				00:08:59		00:04:32				00:08:59
	00:04:01				00:08:11		00:04:58				00:08:11		00:01:40				00:05:16		00:02:15				00:05:16
	00:06:42				00:05:07		00:02:55				00:05:07		00:09:04				00:18:17		00:03:50				00:18:17
	00:03:38						00:05:24						00:03:44				00:02:57		00:03:20				00:02:57
	00:03:48						00:07:17						00:02:14				00:04:17		00:03:20				00:04:17
	00:03:50						00:05:11						00:02:21				00:20:33						00:20:33
	00:01:29												00:03:16				00:09:50						00:09:50
	00:01:51												00:05:22				00:09:41						00:09:41
	00:08:02																00:01:27						00:01:27
	00:04:12																00:06:06						00:06:06
	00:13:23																00:01:35						00:01:35
	00:08:04																00:04:05						00:04:05
	00:11:01																00:02:30						00:02:30
																	00:02:58						00:02:58
																	00:01:25						00:01:25
																	00:09:00						00:09:00
																	00:22:46						00:22:46
																	00:04:05						00:04:05
																	00:04:47						00:04:47
																	00:04:35						00:04:35
																	00:06:05						00:06:05
																	00:06:10						00:06:10
																	00:03:57						00:03:57
																	00:06:32						00:06:32
																	00:13:55						00:13:55
																	00:22:40						00:22:40
																	00:06:25						00:06:25
																	00:19:26						00:19:26
																	00:04:19						00:04:19
																	00:05:46						00:05:46
																	00:11:08						00:11:08
																	00:03:51						00:03:51
																	00:06:08						00:06:08
																	00:08:02						00:08:02
																	00:07:25						00:07:25
																	00:01:50						00:01:50
																	00:03:03						00:03:03
																	00:06:41						00:06:41
																	00:14:05						00:14:05
																	00:06:25						00:06:25
[truncated: 16 more columns]
