# Supplementary material for: The function of juvenile–adult transition axis in female sexual receptivity of Drosophila melanogaster
Source: eLife. 2024 Sep 6;12:RP92545. doi: 10.7554/eLife.92545 (PMC11379460; doi:10.7554/eLife.92545)
Supplement: Figure 6—source data 1. [file elife-92545-fig6-data1.xlsx]

## Sheet: Sheet1
Figure 6E				Figure 6F				Figure 6G				Figure 6H
Genotpe	Fluorescence	Genotpe	Fluorescence	Genotpe	Fluorescence	Genotpe	Fluorescence	Genotpe	Cell number	Genotpe	Cell number	Genotpe	Basal GCamp6s	Genotpe	Basal GCamp6s
UAS-mCD8GFP;pC1-ss2-GAL4	75.7497	UAS-mCD8GFP;pC1-ss2-GAL4/UAS-EcR-A-RNAi	153.085	UAS-mCD8GFP;pC1-ss2-GAL4	135.857	UAS-mCD8GFP;pC1-ss2-GAL4/UAS-EcR-A-RNAi	301.534	UAS-mCD8GFP;pC1-ss2-GAL4	10	UAS-mCD8GFP;pC1-ss2-GAL4/UAS-EcR-A-RNAi	10	UAS-GCamp6s;pC1-ss2-GAL4/+	8146.88	UAS-GCamp6s;pC1-ss2-GAL4/UAS-EcR-A-RNAi	6665.2
	51.8264		273.683		100.44		255.675		10		10		26200.2		45527.9
	15.0501		342.039		153.649		279.04		10		10		23627.2		2911
	29.3197		252.902		79.646		188.59		8		9		29697.2		23852.3
	85.5649		191.852		180.102		468.959		10		9		39612.8		41554.1
	105.056		231.957		156.969		385.708		9		10		32652.4		23240.9
	92.7482		238.103		190.57		387.95		10		10		3554.76		38272.4
													30039.7		28441.6
													4095.6		16329.8
													29727.5		18780.1
													9574.2		45283.4
													2569.76		6129.44
													29356.6		16103
													25138		5236.44
													37992.6		53792.8
													76660.2		13466.8
													49274.8		35411.4
													22252.5		84240
													22654.7		66611.8
													13749.5		1392.8
													35020.7		27059.7
													12896.8		24487.6
