# Supplementary material for: The function of juvenile–adult transition axis in female sexual receptivity of Drosophila melanogaster
Source: eLife. 2024 Sep 6;12:RP92545. doi: 10.7554/eLife.92545 (PMC11379460; doi:10.7554/eLife.92545)
Supplement: Figure 7—source data 1. [file elife-92545-fig7-data1.xlsx]

## Sheet: Sheet1
Note: the blue cells indicate that the copulation did not success within 30min.
Figure 7-A					Figure 7C				Figure 7E						Figure 7F
Genotpe	Relative EcR-A mRNA	Genotpe	Relative EcR-A mRNA		Genotpe	Fluorescence	Genotpe	Fluorescence	Genotpe	StartTime	Genotpe	StartTime	Genotpe	StartTime	Genotpe	speed(mm/s)	Genotpe	speed(mm/s)	Genotpe	speed(mm/s)
PtthDelete/+	1.03	PtthDelete/PtthDelete	2.27		PtthDelete/+;pC1-ss2-Gal4/UAS-GFP	190.574	PtthDelete/PtthDelete;pC1-ss2-Gal4/UAS-GFP	191.44	pC1-ss2-Gal4/+	00:09:46	UAS-torso-RNAi/+;pC1-ss2-Gal4/+	00:09:21	UAS-torso-RNAi/+	00:07:26	pC1-ss2-Gal4/+	3.22002	UAS-torso-RNAi/+;pC1-ss2-Gal4/+	3.14766	UAS-torso-RNAi/+	2.3517
	1.01		1.58			175.218		137.02		00:10:43		00:28:27		00:05:58		2.49642		2.8944		2.56878
	1.01		1.75			251.814		99.57		00:12:01				00:04:47		2.93058		2.5326		2.38788
	1.02		2.54			234.051		68.93		00:04:22				00:05:45		2.8944		3.54564		2.13462
	1.01		1.24			245.201		133.17		00:02:58				00:10:36		2.64114		2.5326		2.42406
	1.01		1.22			178.347		147.48		00:13:32				00:04:25		2.5326		2.64114		2.38788
	1.01					206.354		95.87		00:17:54				00:02:35		2.5326		2.74968		3.22002
	1									00:15:37				00:04:21		2.82204		2.09844		2.85822
										00:13:33				00:05:47		2.3517		2.42406		2.64114
										00:07:04				00:03:36		2.78586		2.06226		2.02608
										00:19:37				00:13:48
										00:07:35				00:13:22
										00:12:36				00:06:17
										00:23:05				00:03:36
										00:21:29				00:11:06
										00:12:15				00:02:17
										00:10:46				00:07:04
										00:08:05				00:01:56
										00:11:35				00:06:38
										00:05:56				00:04:36
										00:17:46				00:06:15
										00:20:05				00:05:35
										00:27:17				00:05:13
										00:13:32				00:03:28
										00:15:59				00:06:45
										00:15:10				00:01:59
										00:19:57				00:02:16
										00:24:56				00:01:39
										00:11:04				00:12:39
										00:29:36				00:06:35
										00:23:50				00:05:12
										00:23:03				00:03:49
										00:05:19				00:04:12
										00:02:34				00:04:58
										00:07:26				00:04:07
										00:11:43				00:03:14
										00:05:46				00:09:14
										00:14:52				00:04:37
										00:13:33				00:05:21
										00:14:20				00:06:33
										00:17:12				00:06:15
										00:11:58				00:05:41
										00:06:57				00:04:09
										00:03:53				00:04:12
										00:11:44				00:05:10
										00:14:53				00:05:05
										00:06:59				00:14:34
										00:21:10				00:05:04
														00:03:14
														00:03:00
														00:03:48
														00:05:07
														00:10:11
														00:05:47
														00:04:37
														00:10:57
														00:03:44
														00:07:10
														00:04:09
														00:25:13
														00:05:21
														00:02:32
														00:04:37
